1 **TITLE: LRRC15 suppresses SARS-CoV-2 infection and controls collagen**  
2 **production**

3  
4  
5  
6 Authors

7  
8 Lipin Loo<sup>1,5</sup>, Matthew A. Waller<sup>1,5</sup>, Alexander J. Cole<sup>2</sup>, Alberto Ospina Stella<sup>3</sup>, Cesar L.  
9 Moreno<sup>1</sup>, Christopher E. Denes<sup>1</sup>, Zina Hamoudi<sup>1</sup>, Felicity Chung<sup>1</sup>, Anupriya Aggarwal<sup>3</sup>, Jason  
10 K. K. Low<sup>4</sup>, Karishma Patel<sup>4</sup>, Rezwan Siddique<sup>4</sup>, Joel Mackay<sup>4</sup>, Stuart Turville<sup>3</sup>, Daniel  
11 Hesselson<sup>2</sup>, G. Gregory Neely<sup>1,6</sup>

12  
13 Affiliations

14  
15 <sup>1</sup>Charles Perkins Centre, Dr. John and Anne Chong Lab for Functional Genomics, Centenary  
16 Institute, and School of Life and Environmental Sciences, University of Sydney, Camperdown,  
17 NSW, Australia.

18 <sup>2</sup>Centenary Institute and Faculty of Medicine and Health, The University of Sydney, Sydney,  
19 NSW, 2006, Australia

20 <sup>3</sup>The Kirby Institute, University of New South Wales, New South Wales, Australia.

21 <sup>4</sup>School of Life and Environmental Sciences, The University of Sydney, Sydney, New South  
22 Wales 2006, Australia.

23 <sup>5</sup>These authors contributed equally

24 <sup>6</sup>Lead contact

25 \*Correspondence: [greg.neely@sydney.edu.au](mailto:greg.neely@sydney.edu.au) (G.G.N.)

26  
27 **In Brief**

28  
29 Using pooled whole genome CRISPR activation screening, we identify the TLR relative  
30 LRRC15 as a novel SARS-CoV-2 Spike interacting protein. LRRC15 is not a SARS-CoV-2  
31 entry receptor, but instead can suppress SARS-CoV-2 infection. LRRC15 is expressed by lung  
32 fibroblasts and regulates both collagen production and infection of ACE2-expressing target cells.  
33 This may provide a direct link between SARS-CoV-2 particles and lung fibrosis seen in “long-  
34 haul” COVID-19 patients.

35  
36 **Highlights**

- 37  
38 ● Whole genome CRISPR activation screening implicates the TLR relative LRRC15 in  
39 SARS-CoV-2 Spike binding  
40 ● LRRC15 suppresses live SARS-CoV-2 virus infection

- 41 • LRRC15 is expressed in lung fibroblasts and sequesters virus while controlling collagen  
42 production
- 43 • LRRC15 can act as a master regulator of infection and fibrosis, potentially controlling  
44 SARS-CoV-2 infection outcomes and “long-haul” COVID-19

45  
46

## 47 **Summary**

48 Although ACE2 is the primary receptor for SARS-CoV-2 infection, a systematic assessment of  
49 factors controlling SARS-CoV-2 host interactions has not been described. Here we used whole  
50 genome CRISPR activation to identify host factors controlling SARS-CoV-2 Spike binding. The  
51 top hit was a Toll-like receptor-related cell surface receptor called *leucine-rich repeat-containing*  
52 *protein 15 (LRRC15)*. *LRRC15* expression was sufficient to promote SARS-CoV-2 Spike  
53 binding where it forms a cell surface complex with LRRC15 but does not support infection.  
54 Instead, LRRC15 functioned as a negative receptor suppressing both pseudotyped and live  
55 SARS-CoV-2 infection. *LRRC15* is expressed in collagen-producing lung myofibroblasts where  
56 it can sequester virus and reduce infection in *trans*. Mechanistically LRRC15 is regulated by  
57 TGF- $\beta$ , where moderate LRRC15 expression drives collagen production but high levels suppress  
58 it, revealing a novel lung fibrosis feedback circuit. Overall, LRRC15 is a master regulator of  
59 SARS-CoV-2, suppressing infection and controlling collagen production associated with “long-  
60 haul” COVID-19.

61

## 62 **Keywords**

63 LRRC15, SARS-CoV-2, COVID-19, Spike, CRISPR activation screen, gain of function, long-  
64 haul COVID-19

65

## 66 **Introduction**

67

68 The Coronavirus 2019 (COVID-19) pandemic, caused by SARS-CoV-2, represents the greatest  
69 public health challenge of our time. As of November 2021, there have been over 250,000,000  
70 reported cases of COVID-19 globally and in excess of 5,000,000 subsequent deaths (WHO).  
71 SARS-CoV-2 shows high sequence similarity (79.6%) with severe acute respiratory syndrome  
72 coronavirus (SARS-CoV-1), and because of this similarity, angiotensin-converting enzyme 2  
73 (ACE2), the primary entry receptor for SARS-CoV-1, was quickly identified as the SARS-CoV-  
74 2 Spike receptor (Kuba et al., 2005; Li et al., 2003; Lu et al., 2020; Zhou et al., 2020). However,  
75 a comprehensive search for other host factors that promote SARS-CoV-2 Spike binding has not  
76 yet been reported.

77

78 To identify novel host factors that can influence cellular interactions with the SARS-CoV-2  
79 Spike protein, we used a whole genome CRISPR activation approach. Using the Calabrese  
80 Human CRISPR Activation Pooled Library (Sanson et al., 2018), we identified a TLR-related  
81 cell surface receptor named leucine-rich repeat-containing protein 15 (LRRC15) as a novel  
82 SARS-CoV-2 Spike binding protein in three independent whole genome screens. LRRC15 was  
83 confirmed to promote Spike binding via flow cytometry, immunoprecipitation and confocal  
84 microscopy. Mechanistically, LRRC15 is not a SARS-CoV-2 entry receptor, instead ectopic  
85 LRRC15 expression was sufficient to inhibit SARS-CoV-2 pseudovirus infection and can also  
86 suppress live SARS-CoV-2 infection. *LRRC15* is primarily expressed in innate immune barriers

87 including placenta, skin, and lymphatic tissues as well as perturbed-state tissue fibroblasts. By  
88 analysing single cell sequencing data from COVID lung infections, we found fibroblast numbers  
89 significantly increase, and collagen-producing fibroblasts are primarily LRRC15<sup>+</sup>. Importantly,  
90 LRRC15 expression can suppress SARS-CoV-2 pseudovirus infection in *trans* and its expression  
91 levels control collagen production in fibroblasts. Overall, we show LRRC15 is a master regulator  
92 of SARS-CoV-2 infection outcomes, physically linking SARS-CoV-2 to perturbed-state  
93 fibroblasts, collagen production and fibrosis associated with “long-haul” COVID.

94

## 95 **Results**

96

### 97 *High throughput SARS-CoV-2 Spike binding assay*

98

99 Based on *a priori* knowledge of SARS-CoV-1, ACE2 was rapidly identified as the primary  
100 receptor for SARS-CoV-2 Spike protein (Zhou et al., 2020). To investigate other host factors that  
101 modulate cellular interactions with SARS-CoV-2 Spike, we employed a pooled CRISPR  
102 activation (CRISPRa) screening approach. To this end, we developed a novel cellular flow  
103 cytometry-based SARS-CoV-2 Spike binding assay using Alexa Fluor 488-labeled Spike protein  
104 (Spike488; **Figure 1A**). While wild-type HEK293T (WT HEK293T) cells that express low  
105 levels of ACE2 show minimal binding to Spike488, when we provided ACE2 cDNA HEK293T-  
106 ACE2 cells exhibited high Spike488 binding activity (**Figure 1B**). To assess the sensitivity of  
107 this assay, we mixed HEK293T-ACE2 and WT HEK293T cells at various ratios and then  
108 measured Spike488 binding by flow cytometry. An increase in Spike488-binding cells could be  
109 detected when as little as 1% of the total population was ACE2<sup>+</sup>, indicating that this assay has  
110 sufficient sensitivity to enable genome-wide screens (**Figure 1C**). To perform a pooled  
111 CRISPRa screen with this system, we generated a stable HEK293T cell line expressing  
112 CRISPRa machinery (MS2-p65-HSF + VP64; HEK293T-CRISPRa) (**Figure 1D**). We tested  
113 HEK293T-CRISPRa clones for the ability to induce ACE2 expression using 3 independent single  
114 guide RNAs (sgRNAs) (Horlbeck et al., 2016). We selected Clone 1 for further use, since it  
115 induced similar levels of ACE2 expression compared to cDNA overexpression, (**Supplementary**  
116 **Figure 1A**), and confirmed that CRISPRa induction of ACE2 expression conferred Spike488  
117 binding by flow cytometry (**Figure 1E**).

118

### 119 *CRISPR activation screening for regulators of SARS-CoV-2 Spike binding identifies LRRC15*

120

121 Having established the utility of our system, we used the Calabrese Human CRISPR Activation  
122 Pooled guide Library (Sanson et al., 2018) to drive CRISPRa-dependent expression of the human  
123 genome in HEK293T-CRISPRa cells. Cells were infected with lentivirus-packaged CRISPRa  
124 sgRNAs and then selected on puromycin to enrich for transduced cells. Transduced cells were  
125 incubated with Spike488 and sorted by FACS to isolate CRISPRa-sgRNA cells with enhanced  
126 Spike binding. Overall, pooled CRISPRa-sgRNA cells showed more Spike binding than mock-  
127 transduced controls (**Supplementary Figure 1C**). Genomic DNA (gDNA) was collected from  
128 unselected or Spike488-selected cells and sgRNA abundance quantified by sequencing (**Figure**  
129 **2A**) and then data analyzed using the MAGeCK analysis platform (v0.5.9) (Li et al., 2014) and  
130 plotted using MAGeCKFlute (v1.12.0) (Wang et al., 2019). Using an FDR cut off of 0.25, our  
131 top hit was the transmembrane protein LRRC15 (LogFC 4.748, P value 2.62x10<sup>-7</sup>, FDR  
132 0.00495), followed by the SARS-CoV-2 entry receptor ACE2 (LogFC 2.1343, P value 2.65x10<sup>-5</sup>,

133 FDR 0.25). (**Figure 2B-D; Supplementary Table 1**). Moreover, we conducted 2 additional  
134 screens under slightly different conditions, and in all screens our top hit was LRRC15  
135 (**Supplementary Figure 2A-F**).

136  
137 We expressed the *LRRC15* sgRNAs that were hits in our screens in HEK293T-CRISPRa cells  
138 and confirmed that they induce expression of *LRRC15* (~approximately 2000 fold induction,  
139 **Supplementary Figure 2G**). Moreover, LRRC15-overexpressing cells dramatically increased  
140 SARS-CoV-2 Spike488 binding, with *LRRC15* sgRNA 1 inducing binding to levels comparable  
141 to cells overexpressing *ACE2* sgRNA3 (**Figure 2E**). LRRC15 overexpression did not itself  
142 upregulate *ACE2* transcription, suggesting the increased Spike binding in LRRC15-expressing  
143 cells is independent of *ACE2* upregulation (**Supplementary Figure 2H**). Conversely, only one  
144 of the three *ACE2* sgRNAs from the Calabrese library efficiently activated *ACE2* expression  
145 (**Supplementary Figure 2I-J**), explaining why *ACE2* itself was not a higher ranked hit in our 3  
146 CRISPRa screens (**Figure 2D, Supplementary Figure 2A-F**). To avoid spectral overlap with  
147 GFP-expressing cell lines we conjugated Spike with Alexa Fluor 647 (Spike647), which was  
148 used for the rest of the study. Using *ACE2* sgRNA3 and *LRRC15* sgRNA1 cells, we measured  
149 14.6 nM affinity for ACE2/Spike647, which is similar to previous estimates (range: 4.7 - 133.3  
150 nM (Lan et al., 2020; Wang et al., 2020; Wrapp et al., 2020)) and 70.4 nM for  
151 LRRC15/Spike647 (**Figure 2F**).

152  
153 *LRRC15 is a new transmembrane SARS-CoV-2 Spike interacting protein*

154  
155 LRRC15 is a 581 amino acid (a.a.) leucine-rich repeat (LRR) protein with 15 extracellular LRRs  
156 followed by a single transmembrane domain and a short 22 a.a. intracellular domain (**Figure 3A**  
157 **and 3B**). LRRC15 belongs to the LRR Tollkin subfamily that includes TLR1-13 and is most  
158 closely related to the platelet von Willebrand factor receptor subunit Glycoprotein V (GP5)  
159 (Dolan et al., 2007) (**Figure 3C**, full tree in **Supplementary Figure 3A**). To confirm a role for  
160 LRRC15 in SARS-CoV-2 Spike binding and ensure the interaction was not an artifact of our  
161 CRISPRa strategy, we transfected *LRRC15*-GFP cDNA into HEK293T cells and observed  
162 Spike647 binding by flow cytometry. There are two reported isoforms of LRRC15 (LRRC15\_1  
163 and LRRC15\_2), with LRRC15\_1 having 6 additional amino acids at the N-terminus. Although  
164 cells transfected with GFP alone showed no binding to Spike647, cells expressing *LRRC15*  
165 isoform 1 or 2 both showed strong Spike binding (**Figure 3D**). While LRRC15-dependent Spike  
166 binding was higher than cells stably expressing *ACE2* (62.1% and 64.5% vs. 48.8%), co-  
167 expression of LRRC15 with *ACE2* was additive resulting in 86.3% positive (LRRC15\_1) or  
168 83.8% positive (LRRC15\_2) cells (**Figure 3E**). Interestingly, all cells (100%) stably expressing  
169 *ACE2* and *TMPRSS2* bound Spike647 regardless of LRRC15 expression (**Figure 3F**). However,  
170 LRRC15 expression in HEK293T-*ACE2*-*TMPRSS2* cells still enhanced the amount of cell  
171 surface Spike647 bound by each cell as measured by mean fluorescence intensity (**Figure 3G**).  
172 Moreover, both *LRRC15* isoforms colocalized with Spike647 (**Figure 3H**). To independently  
173 confirm an interaction between LRRC15 and SARS-CoV-2 Spike protein, we added Spike to  
174 LRRC15-expressing cells and then immunoprecipitated LRRC15. While control GFP transfected  
175 HEK293T cells did not show any signal at the size predicted for Spike (~200 kDa, (Hsieh et al.,  
176 2020)) (**Supplementary Figure 3B-C**), when we expressed and then pulled down either  
177 LRRC15\_1 or LRRC15\_2, in both cases we co-immunoprecipitated Spike protein in the eluate  
178 (**Figure 3I**). Taken together, these data show that LRRC15 expression is sufficient to confer



179 SARS-CoV-2 Spike binding to HEK293T cells, and LRRC15 can further enhance Spike  
180 interactions in the presence of ACE2 and TMPRSS2.

181  
182 *LRRC15 is not a SARS-CoV-2 entry receptor but can suppress Spike-mediated entry and live*  
183 *virus infection*

184  
185 We next asked if LRRC15 can act as a receptor for SARS-CoV-2 and mediate viral entry. For  
186 this we used a SARS-CoV-2 pseudotyped lentivirus system (SARS-CoV-2 pseudovirus) that  
187 displays the SARS-CoV-2 Spike protein and carries a luciferase reporter (**Figure 4A,**  
188 **Supplementary Figure 4A**). Surprisingly, LRRC15 did not confer SARS-CoV-2 pseudovirus  
189 tropism in minimally infectable HEK293T cells (**Figure 4B**). We then tested if LRRC15  
190 expression impacted infection of HEK293T cells expressing ACE2 and TMPRSS2 (**Figure 4C,**  
191 HEK293T-ACE2 cells shown in **Supplementary Figure 4B-C**), which are highly sensitive to  
192 live SARS-CoV-2 infection. Indeed, compared to transfected controls, LRRC15-expressing  
193 HEK293T-ACE2-TMPRSS2 cells show a strong ability to suppress SARS-CoV-2 pseudovirus  
194 infection, ranging from 56% suppression of infection at the lowest viral dose ( $2 \times 10^4$  particles)  
195 to 24% suppression at the highest viral dose ( $5 \times 10^6$  particles) (**Figure 4C**). Next we tested if  
196 LRRC15 expression can also suppress viral replication and cytopathic effect in a live SARS-  
197 CoV-2 infection system. HEK293T-ACE2-TMPRSS2 cells were infected with increasing doses  
198 of SARS-CoV-2 (D614G and Delta variants, **Figure 4D**) and cell death was assessed 48 h later.  
199 Ectopic expression of LRRC15 significantly inhibited D614G infection (two-way ANOVA,  
200  $p < 0.05$ ) but not the Delta variant (**Figure 4E and 4F**). Together, these data show that LRRC15 is  
201 not sufficient to confer SARS-CoV-2 tropism and instead can act to reduce SARS-CoV-2  
202 infection.

203  
204 *LRRC15 is found on lung fibroblasts that are not infected by SARS-CoV-2*

205  
206 At the tissue level, *LRRC15* RNA is most abundant in the placenta, with expression also found in  
207 skin, tongue, tonsils, and lung (Uhlén et al., 2015). At the single cell level, we used the COVID-  
208 19 Cell Atlas data set to confirm *LRRC15* expression in placenta decidua stromal cells (Vento-  
209 Tormo et al., 2018), multiple lymphatic vessels (Huang et al., 2021; Madisson et al., 2019;  
210 Martin et al., 2019; Park et al., 2020), and fibroblasts from the skin (Solé-Boldo et al., 2020),  
211 prostate (Henry et al., 2018) and lung (Bharat et al., 2020; Buechler et al., 2021; Delorey et al.,  
212 2021; Madisson et al., 2019; Melms et al., 2021; Vieira Braga et al., 2019) (**Figure 5A**). In the  
213 lung (Melms et al., 2021) (**Figure 5B**) we found *LRRC15* is primarily expressed in fibroblasts as  
214 well as a population annotated as “neuronal cells” (**Figure 5C**), and these populations were not  
215 infected with SARS-CoV-2 (**Figure 5D**). These data were corroborated by two other COVID-19  
216 patient single cell/nucleus RNAseq data sets that show similar *LRRC15* fibroblast expression  
217 profiles (**Supplementary Figure 5A-F**), which were also not infected (Delorey et al., 2021)  
218 (**Supplementary Figure 5C**). Together, these data support our *in vitro* observations that  
219 LRRC15 does not mediate SARS-CoV-2 infection but may instead act as an innate immune  
220 barrier. In contrast, ACE2 was detected primarily in uninfected type I (AT1) and (AT2) alveolar  
221 epithelium (**Figure 5D**), and SARS-CoV-2-infected alveolar epithelium (“Other epithelial cells”)  
222 that lost AT1/2 markers and upregulated ribosomal transcripts consistent with viral infection and  
223 cell death.

224

225 As single cell data showed an absence of SARS-CoV-2 mRNA in LRRC15<sup>+</sup> fibroblasts, we next  
226 tested infectivity of lung fibroblasts (IMR90) with SARS-CoV-2 pseudovirus. IMR90 fibroblasts  
227 express *LRRC15* endogenously (**Supplementary Figure 5G**) and possess a low level of intrinsic  
228 SARS-CoV-2 Spike binding activity (**Supplementary Figure 5H**). Endogenous LRRC15  
229 expression was confirmed via Western blot (**Supplementary Figure 6A-B**). Transfection of  
230 *LRRC15*-GFP cDNA in these fibroblasts further enhanced Spike binding capacity (**Figure 5E**).  
231 However, similar to WT HEK293T cells, ectopic expression of *LRRC15* was not sufficient to  
232 confer SARS-CoV-2 pseudovirus tropism (**Figure 5F**), confirming that LRRC15 is not a SARS-  
233 CoV-2 entry receptor. Since *LRRC15* and *ACE2* expression are mutually exclusive in the lung,  
234 we next investigated whether LRRC15<sup>+</sup> fibroblasts could act in *trans* to sequester SARS-CoV-2  
235 pseudovirus and suppress infection of the highly permissive HEK293T-*ACE2*-*TMPRSS2* line.  
236 Indeed, co-incubating permissive HEK293T-*ACE2*-*TMPRSS2* cells with LRRC15<sup>+</sup> fibroblasts  
237 could suppress SARS-CoV-2 pseudovirus transduction (**Figure 5G**). Thus, LRRC15 is expressed  
238 on lung fibroblasts where it can bind SARS-CoV-2 spike and help sequester virus from ACE2-  
239 expressing SARS-CoV-2 target cells.

240

241 *LRRC15 is a key regulator of collagen expression*

242

243 Pulmonary fibrosis, driven by fibroblasts, is a hallmark of COVID-19, especially in patients with  
244 “long-haul” disease (George et al., 2020; Rendeiro et al., 2021). To explore the drivers of  
245 fibrosis, we examined single cell datasets from the lungs of control vs COVID-19 patients  
246 (Bharat et al., 2020; Delorey et al., 2021; Melms et al., 2021), and found a significant increase in  
247 the proportion of fibroblasts in COVID-19 lungs (7.9% in control and 22.9% in COVID-19  
248 patients, **Figure 6A**). A recent study on the organization of tissue fibroblasts identified *LRRC15*  
249 as a lineage marker for perturbed state activated myofibroblasts (Buechler et al., 2021). These  
250 specialized fibroblasts arise during disease, express collagen and other ECM-modifying genes,  
251 and participate in tissue repair and fibrosis (Buechler et al., 2021). We also observed lung  
252 *LRRC15*<sup>+</sup> myofibroblasts in multiple COVID-19 patient data sets, and these cells express  
253 collagen (**Figure 6B**). *LRRC15* is upregulated in response to proinflammatory cytokines like  
254 IL1 $\beta$ , IL6, and TNF $\alpha$  (Sato et al., 2002), and TGF $\beta$  also upregulates *LRRC15* (**Figure 6C**) and  
255 *COL1A1* transcripts (**Figure 6D**). Together, *LRRC15* is expressed on collagen producing  
256 fibroblasts both *in vitro* and in the lung of COVID-19 patients and may regulate lung fibrosis.

257

258 To directly investigate the relationship between LRRC15 and collagen, we expressed low (Lo) or  
259 high (Hi) levels of LRRC15 in fibroblasts (or provided GFP as a transfection control) and then  
260 evaluated *COL1A1* expression (**Figure 6E**). Surprisingly, *Lo LRRC15* promoted *COL1A1*  
261 expression while *Hi LRRC15* did not (**Figure 6F**). This bimodal regulation was confirmed with  
262 Western blotting (**Figure 6G**, quantified in **H-I**, full blots in **Supplementary Figure 6**). When  
263 taken together, our working model is that LRRC15 expression is induced by inflammatory  
264 cytokines in COVID-19 lung fibroblasts, where it acts as an innate antiviral barrier that can  
265 sequester SARS-CoV-2 and decrease infection. As infection resolves, and the proinflammatory  
266 context of the lung changes, LRRC15 expression would reduce, and this would then switch  
267 LRRC15<sup>+</sup> fibroblasts from antiviral role to instead promote lung repair (**Figure 6J**). Overall, we  
268 describe the TLR-related receptor LRRC15 as a master regulator of SARS-CoV-2 infection, with  
269 the ability to gauge lung context and physically suppress SARS-CoV-2 infection or promote lung

270 repair. We propose that dysregulation of this novel feedback system may play a role in the  
271 intense lung fibrosis observed in “long-haul” COVID-19 patients.

272

273

## 274 **Discussion**

275

276 Using an unbiased functional genomics approach, we have identified the leucine rich repeat  
277 receptor, LRRC15 as a master regulator of SARS-CoV-2 infection and lung repair. LRRC15  
278 promotes SARS-CoV-2 spike binding comparable to ACE2, however this receptor is not  
279 sufficient to confer viral tropism. LRRC15 is normally highly expressed in the placenta, skin,  
280 and various lymphatics, and is related to TLR innate immune receptors. In previous work,  
281 LRRC15 has been shown to suppress adenovirus infection (O’Prey et al., 2008), and here we  
282 show LRRC15 can also suppress SARS-CoV-2 Spike pseudovirus and live SARS-CoV-2  
283 infection. Given the expression pattern and function of LRRC15, we hypothesize that this  
284 molecule may comprise a new cellular innate immune barrier that is critical for host defense.  
285 Importantly, LRRC15 is found on collagen-producing myofibroblasts where it regulates collagen  
286 production, directly linking SARS-CoV-2 with the development of lung fibrosis seen in “long-  
287 haul” COVID-19.

288

289 LRRC15 was initially identified as a factor induced by pro-inflammatory cytokines that would  
290 be present in the lungs of COVID-19 patients (Satoh et al., 2002). LRRC15 is a member of the  
291 LRR superfamily and LRR-Tollkin subfamily of LRR-containing proteins, many of which play  
292 critical roles in host defense (Dolan et al., 2007). Of the TLR family, LRRC15 is most related to  
293 TLR5, which also recognises a major extracellular virulence factor, the bacterial extracellular  
294 protein flagellin (Hayashi et al., 2001). Remarkably, while this manuscript was in preparation,  
295 Shilts et al. released a preprint describing a similar CRISPR activation strategy to identify new  
296 host factors that can regulate Spike binding; their screen also pulled out LRRC15 as a top factor  
297 driving Spike/host cell interactions (Shilts et al., 2021). This study corroborates our findings,  
298 despite their use of different Spike formulations, CRISPRa machinery, and cell lines. Together,  
299 these studies highlight a fundamental new role for LRRC15 in SARS-CoV-2 biology.

300

301 Several CRISPR Loss of Function (LOF) and Gain of Function (GOF) screens have been  
302 reported in attempts to identify novel SARS-CoV-2 interactors and regulators. Though these  
303 CRISPR screens have been successful in identifying novel SARS-CoV-2 receptors and co-  
304 receptors (Baggen et al., 2021; Goujon et al., 2021; Schneider et al., 2021; Wang et al., 2021;  
305 Zhu et al., 2021), ACE2-regulators (Daniloski et al., 2021; Wei et al., 2021), complexes such as  
306 the vacuolar ATPase proton pump, Retromer, Commander and SWI/SNF chromatin remodeling  
307 machinery (Daniloski et al., 2021; Wei et al., 2021) implicating many new pathways in SARS-  
308 CoV-2 infection (Daniloski et al., 2021; Schneider et al., 2021; Wang et al., 2021), they have all  
309 failed to identify LRRC15. This difference is likely due to SARS-CoV-2 live virus and  
310 pseudovirus screens being unable to divorce Spike binding from downstream effects of infection.  
311 Our fluorophore-conjugated Spike protein/pooled CRISPR screening model thus represents a  
312 new paradigm for investigating host/virus interactions independent of virion entry or cell death.

313

314 Although our data shows that LRRC15 promotes cellular binding to SARS-CoV-2 Spike protein,  
315 we also show that LRRC15 does not act as an entry receptor, but instead inhibits SARS-CoV-2

316 pseudotyped lentivirus infection. This observation is consistent with a report that LRRC15 can  
317 also impede adenovirus infection (O’Prey et al., 2008). When we tested live SARS-CoV-2  
318 strains we also observed a significant anti-SARS-CoV-2 activity for LRRC15, although LRRC15  
319 was much more effective against the D614G vs. the Delta variant. We hypothesize that LRRC15  
320 may play a role in limiting SARS-CoV-2 transmission by sequestering free virus in the airways  
321 of COVID-19 patients, and the Delta variant has adapted to reduce this effect allowing for higher  
322 transmission.

323  
324 While our data highlights a new role for LRRC15 in promoting SARS-CoV-2 Spike binding,  
325 limiting infection, and regulating collagen expression, it is currently unclear how LRRC15  
326 contributes to human COVID-19 disease. We consider multiple possible mechanisms. *In vivo*,  
327 LRRC15 may provide an innate barrier that can slow infection or limit transmission, allowing  
328 additional innate mechanisms to clear SARS-CoV-2. For example, LRRC15 could mediate a  
329 Tetherin-like function to anchor exiting viral particles to limit spread of the virus through the  
330 tissue (Neil et al., 2008). Since in the lung *LRRC15* is found in *ACE2* negative cells, LRRC15  
331 could primarily act to physically sequester SARS-CoV-2 virions away from permissive cells.  
332 Alternatively, the level of LRRC15 expression could control how lung or other tissue fibroblasts  
333 react to infection. We found LRRC15 is regulated by TGF $\beta$ , and others have reported LRRC15  
334 is upregulated by proinflammatory cytokines including TNF $\alpha$ , IL-1 $\beta$  and IFN $\gamma$  (Satoh et al.,  
335 2002). Thus, under conditions of appropriate inflammation, LRRC15 may be upregulated and  
336 play a primary role in immobilizing and sequestering viral particles to control infection while  
337 also suppressing lung fibrosis. LRRC15 may even help fibroblasts pass immobilized virus to  
338 innate lung antigen presenting cells, and a recently published spatial-resolution single cell  
339 analysis of the lung in COVID-19 showed that lung fibroblasts interact with SARS-CoV-2  
340 Spike+ macrophages and dendritic cells (Rendeiro et al., 2021). Then when inflammation  
341 subsides, LRRC15 levels decrease, and lower levels of LRRC15 then promote collagen  
342 deposition supporting lung repair. When this system is dysregulated, for example in conditions  
343 of chronic lung infection, LRRC15 levels may drop during infection, with inappropriate collagen  
344 production then leading to “long-haul” COVID.

345  
346 Our unbiased functional genomic investigation of SARS-CoV-2 Spike/host interactions  
347 identified the novel TLR-related receptor LRRC15 as a powerful host factor driving SARS-CoV-  
348 2 Spike interactions. Further investigation into how LRRC15 contributes to SARS-CoV-2  
349 pathology will help us better understand and treat this and future pandemics.

350  
351

## 352 **STAR Methods**

353  
354 **Resource Availability**

### 355 **Lead contact**

356 Further information and requests for resources and reagents should be directed to and will be  
357 fulfilled by the lead contact, Graham G. Neely ([greg.neely@sydney.edu.au](mailto:greg.neely@sydney.edu.au)).

358  
359 **Materials availability**

360 This study did not generate any new unique reagents.

361  
362 **Data and code availability**



363 CRISPR screen raw read counts have been deposited at GSE186475 and are publicly available as  
364 of the date of publication. CRISPR screen analysis is shown in **Figure 2** and **Supplementary**  
365 **Figure S2**. CRISPR screen output is deposited in **Supplementary Table S1**. This paper also  
366 analyzes existing publicly available single cell RNA-sequencing data. The accession numbers for  
367 these datasets are listed in the Key Resources Table. All data reported in this paper will be shared  
368 by the lead contact upon request. This paper does not report original code. Any additional  
369 information required to reanalyze the data reported in this paper is available from the lead  
370 contact upon request.

371

## 372 **Experimental model and subject details**

373

### 374 **Cell culture**

375 HEK293T cells (female; ATCC, CRL-3216, RRID: CVCL\_0063) were cultured in Dulbecco's  
376 Modified Eagle Medium (ThermoFisher Scientific, Cat #11995065) with 10% HyClone Fetal  
377 Bovine Serum (Cytiva, SH30084.03) and 1% Penicillin-Streptomycin (Gibco, 15140122) at  
378 37°C, 5% CO<sub>2</sub> and atmospheric oxygen. IMR90 E6E7 (female) cells were a gift from Anthony  
379 Cesare (Children's Medical Research Institute, Sydney, Australia). IMR90 E6E7 were cultured  
380 in DMEM (ThermoFisher Scientific, 11995065) supplemented with 10% HyClone FBS (Cytiva,  
381 SH30084.03) and 1x non-essential amino acids (Gibco, 11140050) at 37°C, 3% O<sub>2</sub> and 10%  
382 CO<sub>2</sub>. Expi293F<sup>TM</sup> cells (female; ThermoFisher Scientific, A14527, RRID:CVCL\_D615) were  
383 cultured in Expi293<sup>TM</sup> Expression Medium (ThermoFisher Scientific, A1435101) with 5% CO<sub>2</sub>  
384 and atmospheric O<sub>2</sub> at 37 °C for 24 h and then lowered to 32 °C for 72 h. Cell lines have been  
385 authenticated.

386

## 387 **Method Details**

388

### 389 **Generation of CRISPR activation cell line**

390 HEK293T cells were co-transfected with pPB-  
391 R1R2\_EF1aVP64dCas9VP64\_T2A\_MS2p65HSF1-IRESbsdpa (Addgene #113341) and the  
392 Super PiggyBac Transposase Expression Vector (System Biosciences, PB210PA-1) using  
393 Lipofectamine 3000 Transfection Reagent (ThermoFisher Scientific). These cells (HEK293T-  
394 CRISPRa) were then selected on blasticidin (Merck) at 5 µg/mL for 10 days prior to clonal  
395 isolation and expansion.

396

### 397 **sgRNA vector cloning**

398 Single guide RNA (sgRNA) sequences for non-targeting control and ACE2 were taken from the  
399 Weissman Human Genome-wide CRISPRa-v2 library (Addgene #83978). LRRC15 sgRNA  
400 sequences and additional ACE2 sgRNA sequences were taken from the Human CRISPR  
401 activation pooled library set A (Addgene #92379). Sense and antisense strands for each sequence  
402 were ordered as DNA oligonucleotides (IDT) with 5' overhangs of 5'-CACC-3' on the sense  
403 strand oligonucleotide and 5'-AAAC-3' on the antisense strand oligonucleotide.  
404 Oligonucleotides were annealed at 4°C for 16 h and pXPR-502 (Addgene #96923) was digested  
405 with Esp3I (ThermoFisher Scientific, ER0451) or BsmBI-v2 (New England Biolabs). sgRNA  
406 DNA oligonucleotide duplexes were ligated into the digested pXPR-502 backbone using T4  
407 ligase (New England Biolabs) and incubated at 4°C overnight. NEB 10-beta competent *E. coli*  
408 (New England Biolabs) were transformed with 100 ng of each sgRNA construct by heat-shock,



409 plated onto LB-agar plates (Life Technologies) containing ampicillin (Sigma-Aldrich) and grown  
410 at 37°C. Individual colonies were picked, expanded in Luria broth (Life Technologies)  
411 supplemented with ampicillin and amplified constructs were harvested using either ISOLATE II  
412 Plasmid Mini Kit (Bioline) or PureYield Plasmid Maxiprep System (Promega Corporation).

413

#### 414 **Whole genome sgRNA library amplification**

415 MegaX DH10B T1<sup>R</sup> Electrocomp<sup>TM</sup> Cells (ThermoFisher Scientific) were electroporated with  
416 400 ng Human CRISPR activation pooled library set A (Addgene #92379) and left to recover in  
417 Recovery Medium for 1 hour at 37°C. Cells were then spread on 600 cm<sup>2</sup> LB-agar plates  
418 supplemented with carbenicillin (Merck) and incubated at 37°C for 16 hours. All colonies were  
419 scraped, collected and processed using the PureYield Plasmid Maxiprep System (Promega  
420 Corporation). The concentration of the plasmid library was determined via Nanodrop  
421 (ThermoFisher Scientific).

422

#### 423 **Lentivirus production and viral transduction**

424 Lipofectamine 3000 Transfection Reagent (ThermoFisher Scientific) in Opti-MEM Medium  
425 (Gibco) was used to co-transfect HEK293T cells with psPAX2 (Addgene #12260), pCAG-VSVg  
426 (Addgene #35616) and either individual sgRNA constructs ligated into pXPR-502 (Addgene  
427 #96923) or pooled CRISPRa library (Human CRISPR activation pooled library set A, Addgene  
428 #92379) according to the manufacturer's instructions. Cells were incubated with transfection  
429 reagents for 16 h before the media was replaced. Viral media was collected 24 h later. For  
430 individual sgRNA constructs, neat viral media was added to HEK293T-CRISPRa cells with  
431 Polybrene Infection / Transfection Reagent (Sigma-Aldrich) at a concentration of 8 µg/mL. Viral  
432 media was replaced with fresh medium the following day and puromycin dihydrochloride  
433 (Gibco) added 24 h later at a concentration of 1.6 µg/mL for 72 h selection. For sgRNA library  
434 virus, viral media was passed through a 0.45 µm filter (Merck Millipore) and concentrated using  
435 100K MWCO Pierce Protein Concentrators (Life Technologies Australia). Concentrated virus  
436 was then stored at -80°C.

437

#### 438 **SARS-CoV-2 Spike protein production**

439 The expression construct for recombinant soluble trimeric SARS-CoV-2 spike protein (residues  
440 1-1208, complete ectodomain) was generously provided by Dr Florian Krammer (Icahn School  
441 of Medicine, Mt Sinai). This protein was used for the initial setup of the screen (shown in Figure  
442 1) and in one CRISPRa screen (Screen 2). This construct includes the SARS-CoV-2 spike native  
443 signal peptide (residues 1-14) to target the recombinant protein for secretion, stabilising proline  
444 substitutions at residues 986 and 987, substitution of the furin cleavage site (residues 682-685)  
445 with an inert GSAS sequence, and a C-terminal His6-tag to enable affinity purification.

446

447 Soluble trimeric SARS-CoV-2 spike was expressed in EXPI293F<sup>TM</sup> cells via transient  
448 transfection using 25 kDa linear polyethyleneimine (PEI) (Polysciences Inc.). EXPI293F<sup>TM</sup>  
449 cultures were grown at 37°C, with shaking at 130 rpm, to a cell density of 3x10<sup>6</sup> cells/mL before  
450 transfection with pre-formed SARS-CoV-2 spike plasmid DNA:PEI complexes (2 µg/mL DNA  
451 and 8 µg/mL PEI). The transfected cells were incubated at 37°C for 24 h and then at 32°C for a  
452 further 72 h before harvesting. Culture medium, containing secreted SARS-CoV-2 spike, was  
453 harvested by centrifugation at 4000 g for 20 min. Supernatants from the centrifugation step were  
454 supplemented with 20 mM HEPES (pH 8.0) and subjected to immobilised metal affinity

455 chromatography (IMAC) by incubation with Ni-NTA agarose pre-equilibrated with a buffer  
456 consisting of 20 mM NaH<sub>2</sub>PO<sub>4</sub> (pH 8.0), 500 mM NaCl, and 20 mM imidazole. His6-tagged  
457 SARS-CoV-2 spike protein was eluted from the Ni-NTA agarose using a buffer comprising 20  
458 mM NaH<sub>2</sub>PO<sub>4</sub> (pH 7.4), 300 mM NaCl, and 500 mM imidazole. Eluates from affinity  
459 chromatography were concentrated and further purified by gel filtration chromatography using a  
460 Superdex 200 10/30 GL column (Cytiva) and buffer consisting of 20 mM HEPES (pH 7.5) and  
461 150 mM NaCl. The quality of protein purification was assessed by SDS-PAGE and multiple  
462 angle laser light scattering (MALLS).

463  
464 The expression construct for a more stable variant of soluble trimeric SARS-CoV-2 spike  
465 ectodomain protein called “HexaPro” was a gift from Jason McLellan (Addgene, #154754). This  
466 “Hexapro” protein was used in 2 CRISPRa screens (Screen 1 and 3) and in all validation  
467 experiments. This construct, in addition to above, includes 6 total stabilising proline substitutions  
468 at residues 817, 892, 899, 942, 986 and 987. The protein was expressed, and the culture medium  
469 was harvested as above. The supernatant containing the protein was supplemented with 20 mM  
470 HEPES pH 8.0 and subjected to IMAC with Ni-NTA as above. The eluate was dialysed to a  
471 buffer containing 2 mM Tris (pH 8.0) and 200 mM NaCl and concentrated to reduce the total  
472 volume by a factor of 3. The sample was passed through a 0.22 µm filter and purified by gel  
473 filtration chromatography using HiLoad 16/600 Superdex 200 (Cytiva) in a buffer composed of 2  
474 mM Tris (pH 8.0) and 200 mM NaCl. The quality of the protein was assessed by SDS-PAGE  
475 and MALLS.

476  
477 **Conjugation of SARS-CoV-2 Spike glycoprotein with fluorophores**  
478 Spike protein was conjugated to Alexa Fluor™ 488 or Alexa Fluor™ 647 using protein labelling  
479 kits (Invitrogen) according to manufacturer’s instructions. Briefly, 50 µL of 1 M sodium  
480 bicarbonate was added to 500 µl of 2 mg/mL Spike protein. The solution was then added to room  
481 temperature Alexa Fluor™ 488 or 647 reactive dye and stirred for 1 h at room temperature.  
482 Conjugated spike proteins were loaded onto Bio-Rad BioGel P-30 Fine size exclusion  
483 purification resin column and eluted via gravity (Alexa Fluor™ 488) or centrifugation (Alexa  
484 Fluor™ 647). NanoDrop (ThermoFisher Scientific) was used to determine protein concentration.

485  
486 **Generation of ACE2 and dual ACE2/TMPRSS2 cDNA overexpression cell lines**  
487 HEK293T cells stably expressing human ACE2 (HEK293T-ACE2) were generated by  
488 transducing HEK293T cells with a lentivirus expressing ACE2 (Tea et al., 2021). Briefly, ACE2  
489 ORF was cloned into a 3rd generation lentiviral expression vector,  
490 pRRLsinPPT.CMV.GFP.WPRE (Follenzi et al., 2004) using AgeI/BsrGI cut sites, thus  
491 replacing *GFP ORF* with ACE2 to create a novel expression plasmid, herein referred to as ppt-  
492 ACE2. Lentiviral particles expressing ACE2 were produced by co-transfecting ppt-ACE2, a 2nd  
493 generation lentiviral packaging construct psPAX2 and VSV-G plasmid pMD2.G (Addgene  
494 #12259) in HEK293T cells by using polyethylenimine as previously described (Aggarwal et al.,  
495 2012). Virus supernatant was harvested 72 hours post transfection, pre-cleared of cellular debris  
496 and centrifuged at 28,000 xg for 90 minutes at 4 °C to generate concentrated virus stocks. To  
497 transduce HEK293T cells, 10,000 cells per well were seeded in a 96 well tissue culture plate and  
498 virus supernatant added in a 2-fold dilution series. At 72 hours post transduction the surface  
499 expression of ACE2 was measured by immunostaining the cells with anti-ACE2 monoclonal  
500 antibody (Thermo Fisher Scientific, MA5-32307). Cells showing maximal expression of ACE2

501 were then sorted into single cells using BD FACS Aria III cell sorter to generate clonal  
502 populations of HEK293T-*ACE2* cells.

503  
504 For generating HEK293T cells expressing both *ACE2* and *TMPRSS2* (HEK293T-*ACE2*-  
505 *TMPRSS2*), HEK293T-*ACE2* cells described above were transduced with lentiviral particles  
506 expressing *TMPRSS2*. To achieve this, *hTMPRSS2a* (synthetic gene fragment; IDT) was cloned  
507 into lentiviral expression vector pLVX-IRES-ZsGreen (Clontech) using EcoRI/XhoI restriction  
508 sites and lentiviral particles expressing *TMPRSS2* were produced as described above. Lentiviral  
509 transductions were then performed on HEK293T-*ACE2* cells to generate HEK293T-*ACE2*-  
510 *TMPRSS2* cells. Clonal selection led to the identification of a highly permissive clone, HekAT24  
511 (Tea et al., 2021), which was then used in subsequent experiments.

512  
513 **Optimizing a flow cytometry-based assay for determining SARS-CoV-2 Spike binding**

514 HEK293T-*ACE2* cells were dissociated by incubating with TrypLE for 5 min at 37°C and  
515 neutralized with DMEM.  $10^6$  cells were collected, washed with 1% bovine serum albumin (BSA;  
516 Sigma-Aldrich) in Dulbecco's Phosphate Buffered Saline (DPBS; Sigma-Aldrich) and then  
517 incubated with increasing concentrations of Alexa Fluor 488-conjugated SARS-CoV-2 spike  
518 glycoprotein (Spike488) for 30 min at 4°C. The cells were then washed once with DPBS before  
519 resuspending in 1% BSA in DPBS and analyzed using the Cytex Aurora (Cytex Biosciences).  
520 For cell mixing experiments, increasing proportions of HEK293T-*ACE2* cells (0%, 1%, 20%,  
521 50%, 80% and 100%) were combined with decreasing proportions of wildtype (WT) HEK293T  
522 cells (100%, 99%, 80%, 50%, 20%, 0%) to a total of  $10^6$  cells per sample. These samples were  
523 incubated with 50  $\mu\text{g}/\text{mL}$  Spike488 as described above and analyzed using the Cytex Aurora  
524 (Cytex Biosciences).

525 To confirm the validity of this assay in detecting binding in cells expressing CRISPRa  
526 machinery, a clonal line of HEK293T with stable expression of a plasmid encoding dCas9-VP64  
527 and SAM system helper proteins (pPB-R1R2\_EF1aVP64dCas9VP64\_T2A\_MS2p65HSF1-  
528 IRESbdpA) (HEK293T-CRISPRa) was transduced with lentivirus carrying *ACE2* sgRNA 1 or  
529 non-targeting control sgRNA. These cells were then incubated with Spike488 as previously  
530 described and analyzed on the Cytex Aurora (Cytex Biosciences).

531  
532 **CRISPR activation screening**

533 HEK293T-CRISPRa cells were transduced with concentrated Human CRISPR activation pooled  
534 library set A (Addgene #92379)-carrying lentivirus at a multiplicity of infection (MOI) of  
535 approximately 0.5. Cells were selected on puromycin dihydrochloride (Gibco) at a concentration  
536 of 1.6  $\mu\text{g}/\text{mL}$  for 3 days (screen 1 and 2).  $3 \times 10^7$  cells (>500 cells/guide) were incubated with  
537 Spike488 for 30 min at 4°C, washed to remove excess spike protein, and sorted for increased  
538 Alexa Fluor 488 intensity using the BD FACSMelody Cell Sorter (BD Biosciences). Gates for  
539 flow assisted cytometric sorting were set using non-targeting control (NTC) sgRNA-transduced  
540 cells as a negative control and *ACE2* sgRNA-transduced cells as a positive control, both of which  
541 had been incubated with Spike488 under the same conditions as stated previously. Unsorted cells  
542 were maintained separately so as to be used as a diversity control. Cells were expanded and  
543  $2 \times 10^6$  cells were then collected for genomic DNA (gDNA) extraction for sorted samples and  
544  $3 \times 10^7$  for the unsorted diversity control. Remaining diversity control cells were re-seeded and  
545 once again incubated with Spike488 under the same conditions as stated previously (screen 3).  
546 These Spike-incubated cells were sorted again but selected on puromycin for eight days prior to

547 expansion and collection of  $1 \times 10^7$  cells from both the sorted cell population and the unsorted  
548 diversity control population for gDNA extraction. Gating strategy is shown in **Supplementary**  
549 **Figure 1B**.

550  
551 gDNA was extracted from all collected cells using the ISOLATE II Genomic DNA Kit (Bioline).  
552 Samples were prepared for NGS via PCR. Genomic DNA (25  $\mu$ g for unsorted diversity control  
553 samples, 5  $\mu$ g for sorted samples) was added to NEBNext High-Fidelity 2X PCR Master Mix  
554 (New England Biolabs) and 0.4  $\mu$ M P5 staggered primer mix and 0.4  $\mu$ M of P7 indexing primer  
555 unique to each sample. PCR cycling conditions and primers were adapted from Sanson et al.  
556 (Sanson et al., 2018). Primer sequences can be found in **Supplementary Table S3**. Briefly,  
557 reactions were held at 95°C for 1 min, followed by 28 cycles of 94°C for 30 s, 53°C for 30 s and  
558 72°C for 30 s, followed by a final 72°C extension step for 10 min. Amplicons were gel extracted  
559 and purified using the ISOLATE II PCR & Gel Kit (Bioline) and the quality and concentration of  
560 DNA assessed with the High Sensitivity DNA kit (Agilent Technologies). Samples were then  
561 sent to Novogene for next generation sequencing. Raw next generation sequencing reads were  
562 then processed using MAGeCK (v0.5.9) (Li et al., 2014) to identify enriched genes. Plots were  
563 generated using MAGeCKFlute (v1.12.0) (Wang et al., 2019) Normalized read counts were  
564 produced using MAGeCK 'count' function on each pairing of unsorted diversity control and  
565 sorted sample. Mean and standard deviation was calculated for each individual sample (i.e.  
566 separately for diversity control and sorted sample) and the Z-score calculated using  $Z = \frac{x - \mu}{\sigma}$ ,  
567 where x is the normalized read count for an individual sgRNA,  $\mu$  is the mean of all normalized  
568 read counts in the sample and  $\sigma$  is the standard deviation of all normalized read counts in the  
569 sample.

570

### 571 **Validation of ACE2 and LRRC15 by CRISPRa**

572 To validate the function of LRRC15 in binding SARS-CoV-2 spike, clonal HEK293T-CRISPRa  
573 cells were transduced with lentivirus carrying *ACE2* sgRNAs, *LRRC15* sgRNAs or a NTC  
574 sgRNA. Cells were selected on 1.6  $\mu$ g/mL puromycin dihydrochloride (Gibco) for 3 days and  
575 then collected for analysis by RT-qPCR and flow cytometry. For validation by flow cytometry,  
576  $1 \times 10^6$  cells were incubated with 50  $\mu$ g/mL Spike647 as previously described and then analyzed  
577 using the Cytex Aurora (Cytex Biosciences). Binding affinity of ACE2 and LRRC15 were  
578 conducted with *ACE2* sgRNA3 and *LRRC15* sgRNA1 cells with 1, 5, 10, 25, 50 and 100  $\mu$ g/mL  
579 Spike647 (corresponding to 7, 35, 70, 175, 350 and 700 nM).

580

### 581 **RNA extraction and RT-qPCR**

582 RNA was isolated from cells using the ISOLATE II RNA Mini Kit (Bioline) and concentration  
583 was measured by Nanodrop (Thermo Scientific). cDNA was synthesized using the iScript Select  
584 cDNA Synthesis Kit (Bio-Rad) according to manufacturer's instructions. Briefly, 500 ng of RNA  
585 was added to iScript RT Supermix and nuclease-free water to a final volume of 20  $\mu$ L. The  
586 assembled reactions were then incubated in a thermocycler as follows: 25°C for 5 min, 46°C for  
587 20 min and then 95°C for 1 min. RT-qPCR was then performed on the cDNA samples using  
588 SYBR Select Master Mix (ThermoFisher Scientific) and the LightCycler 480 System (Roche).  
589 All primer sequences used are listed in the Key Resources Table. Results were analyzed using  
590 the  $\Delta\Delta C_T$  method.

591

### 592 **LRRC15 crystal structure prediction**



593 The predicted crystal structure for LRRC15 was calculated using AlphaFold (v2.0) (Jumper et  
594 al., 2021) (<https://alphafold.ebi.ac.uk/entry/Q8TF66>) and sourced via UniProt (UniProt  
595 Consortium, 2021) (<https://www.uniprot.org/uniprot/Q8TF66>).

596

### 597 **LRR Tollkin Phylogenetic Tree**

598 Protein sequences of LRR Tollkin family members (Dolan et al., 2007) were clustered using  
599 Clustal Omega (v1.2.2) (Sievers et al., 2011). The phylogenetic (Newick) tree was visualized  
600 with MEGA11 (Sievers et al., 2011; Stecher et al., 2020).

601

### 602 **Validation of LRRC15 independent of CRISPR activation**

603 *LRRC15-TurboGFP* fusion constructs (Origene, RG225990 and RG221437) were used for flow  
604 cytometry, immunoprecipitation, signaling and immunocytochemistry experiments while  
605 *LRRC15-myc-DDK* fusion constructs (Origene, RC225990 and RC221437) were utilized for  
606 SARS-CoV-2 pseudovirus and SARS-CoV-2 live virus inhibition experiments. *LRRC15*  
607 transcripts were excised from the *LRRC15-TurboGFP* and *LRRC15-myc-DDK* constructs and  
608 replaced with multiple cloning site to generate empty vector controls for transfection.

609

610 To evaluate the role of LRRC15 in binding SARS-CoV-2 spike glycoprotein independent of  
611 CRISPR activation machinery, 2.5 µg of plasmids carrying the *GFP*-tagged *LRRC15* cDNA  
612 transcript 1 or 2, or empty vector control were transfected into HEK293T, HEK293T-*ACE2* and  
613 HEK293T-*ACE2-TMPRSS2* cells as described above. For each sample, 10<sup>6</sup> cells were collected  
614 and incubated with Alexa Fluor 647-conjugated SARS-CoV-2 spike glycoprotein (Spike647) and  
615 analyzed using the Cytex Aurora (Cytex Biosciences) as described above.

616

### 617 **Immunoprecipitation**

618 For SARS-CoV-2 spike pulldown, 2x10<sup>7</sup> HEK293T cells transfected with *LRRC15-TurboGFP*  
619 (transcript 1 and 2) or *pLJMI-EGFP* (Addgene #19319) were incubated with 50 µg/mL spike  
620 hexapro for 30 min at 4°C with rotation. Cells were washed with DPBS (Sigma-Aldrich, D8537)  
621 and incubated for 15 min in lysis buffer (1% Igepal-CA-630, 5 mM Tris HCl (pH 7.4), 150 mM  
622 NaCl, 1 mM MgCl<sub>2</sub>, 5% glycerol, 10 mM NaF, 10 mM sodium pyrophosphate, 10 mM sodium  
623 orthovanadate, 60 mM β-Glycerophosphate, 1X complete EDTA-free protease inhibitor (Roche))  
624 on ice. Samples were then sonicated at 90% amplitude for 30 seconds using the BANDELIN  
625 SONOPULS mini20 and spun down at 18,000 g for 10 mins. Concentration of protein samples  
626 was determined using BCA assay (ThermoFisher Scientific). 1 µg of anti-LRRC15 antibody  
627 (Abcam, EPR8188(2)) or rabbit IgG (Covance, CTL-4112) was added to 1 mg protein lysate and  
628 incubated at 4°C with rotation for 2.5 h before precipitation with protein G (ThermoFisher  
629 Scientific). Immunoprecipitated proteins were eluted with 0.1 M Tris and 4% SDC. Input, flow-  
630 through and eluate were mixed with 4X loading buffer and heated at 95°C for 5 min. Samples  
631 were loaded into pre-cast polyacrylamide gels (4-20% gradient, Bio-Rad) and electrophoresed at  
632 90 V for 1.5 h. Proteins were transferred to 0.45 µm nitrocellulose membranes at 100 V for 1 h.  
633 Membranes were blocked in Intercept blocking buffer (LI-COR) for 30 min at room temperature  
634 with gentle agitation. Blocking solution was replaced with primary antibody (Spike, LRRC15)  
635 Intercept buffer and membranes incubated overnight at 4°C with gentle agitation. Membranes  
636 were washed three times with TBST for 5 min with agitation prior to the incubation of  
637 membranes with secondary antibody in Intercept buffer for 2 h at room temperature. Membranes  
638 were washed another three times with TBST and then imaged using the Odyssey CLx (LICOR).



639

### 640 **Confocal imaging**

641 13 mm round coverslips were coated with Matrigel (Corning) diluted in DPBS and incubated for  
642 30 min at 37°C. HEK293T cells transfected with LRRC15 cDNA constructs were seeded onto  
643 the Matrigel-coated coverslips at a density of 50,000 cells per coverslip. The following day, cells  
644 were incubated with Alexa Fluor™ 647-conjugated SARS-CoV-2 spike protein at a  
645 concentration of 10 µg/mL in culture media for 30 min at 37°C. The cells were fixed in 4%  
646 paraformaldehyde (PFA) for 20 min at room temperature, washed 3 times with DPBS. Cells  
647 were incubated with Hoechst (1:2000 in DPBS) for 20 minutes, washed 3 times and mounted  
648 onto Superfrost plus slides (Fisherbrand) and then imaged using the Leica SP6 confocal  
649 microscope at 40X.

650

### 651 **SARS-CoV-2 pseudotyped lentivirus production and neutralization assay**

652 SARS-CoV-2 pseudovirus was produced using a five-component plasmid system. Plasmid  
653 encoding the SARS-CoV-2 spike protein with an 18 amino acid truncation of the C-terminus was  
654 co-transfected into HEK293T cells with pBCKS(HIV-1SDmCMBEGFP-P2A-luc2pre-IIU),  
655 which permits equimolar expression of firefly luciferase and EGFP, and packaging plasmids  
656 pHCMVgagpolmlstwhv, pcDNA3.1tat101ml and pHCMVRevmlwhvpre. Transfection was  
657 carried out using Lipofectamine 3000 Transfection Reagent (ThermoScientific) according to  
658 manufacturer's instructions. 16 h after transfection, a media change was performed. Viral media  
659 was collected the following day, passed through a 0.45 µm filter and then concentrated using  
660 100K MWCO Pierce Protein Concentrators (Life Technologies Australia). Concentrated virus  
661 was then stored at -80°C. Pseudovirus particle concentrations were determined using the  
662 QuickTiter™ Lentivirus Titer Kit (Cell Biolabs, Inc) under manufacturer conditions.

663

664 For infection of cells with SARS-CoV-2 pseudovirus, *WT* HEK293T, HEK293T-*ACE2* and  
665 HEK293T-*ACE2-TMPRSS2* cells were transfected with cDNA for *myc-DDK*-tagged *LRRC15*  
666 transcript 1, empty *myc-DDK* construct as a control plasmid. Cells were seeded in 96-well plates,  
667 concentrated pseudovirus was added 24 hours later in the presence of 8 µg/ml polybrene.  
668 Successful transduction of cells was confirmed by observing GFP expression 48 h post-  
669 transduction. The extent of transduction was quantified with the Steady-Glo Luciferase Assay  
670 System (Promega Corporation) according to the manufacturer's instructions. Briefly, plates were  
671 allowed to equilibrate to room temperature before 50 µL of Steady-Glo reagent was added to  
672 each well containing 50µL of cell culture media. Plates were incubated at room temperature for 1  
673 h to permit cell lysis and luminescence was then measured using a plate reader. Luminescence of  
674 the *LRRC15* cDNA- and control plasmid-transfected cells was normalized to luminescence  
675 values recorded in non-transduced wells for the corresponding cell type.

676

### 677 **SARS-CoV-2 live virus infection assays**

678 For assessing the inhibitory effect of native overexpression of LRRC15, HEK293T-*ACE2*-  
679 *TMPRSS2* cells were transfected with *myc-DDK*-tagged *LRRC15* transcript 1 plasmid (Origene,  
680 RC225990) for transient overexpression, with empty *myc-DDK* plasmid as a control plasmid.  
681 HEK293T-*ACE2-TMPRSS2* cells were seeded in 384-well plates at a density of  $8 \times 10^3$  cells/well  
682 in the presence of NucBlue™ live nuclear dye (Invitrogen, USA) at a final concentration of 2.5%  
683 v/v. The SARS-CoV-2 isolates B.1.319 ("wildtype" D614G virus) and B.1.617.2 (Delta strain)  
684 were serially diluted in cell-culture medium and an equal volume was then added to the pre-

685 plated and nuclear-stained cells to obtain the desired MOI doses. Viral dilutions were performed  
686 in duplicate. Plates were then incubated at 37°C for 48 hours before whole wells were imaged  
687 with an IN Cell Analyzer HS2500 high-content microscopy system (Cytiva). Nuclei counts were  
688 obtained with automated IN Carta Image Analysis Software (Cytiva) to determine the percentage  
689 of surviving cells compared to uninfected controls. *LRRIC15* and control plasmid-transfected  
690 cells were normalized to the average cell count of uninfected wells for the corresponding cell  
691 type to determine the extent of normalized cell death.

692

### 693 **Single cell RNA-sequencing analysis**

694 *LRRIC15* expression was first queried on the COVID-19 cell atlas interactive website and  
695 summarized in Figure 5A. In depth analysis of lung single cell datasets were conducted on 3  
696 studies (Bharat et al., 2020; Delorey et al., 2021; Melms et al., 2021) with Seurat V4.1.0 (Hao et  
697 al., 2021). Two single nucleus RNAseq datasets were downloaded from the Single Cell Portal  
698 (Broad Institute, SCP1052 and SCP1219) and one single cell RNAseq dataset from Gene  
699 Expression Omnibus (GSE158127). Their accompanying metadata, which includes information  
700 such as sample ID, sample status and cluster annotations (cell types), were added to Seurat  
701 objects using the ‘AddMetaData’ function. Read counts were normalized using SCTransform,  
702 before reanalysis with the standard Seurat workflow of ‘RunPCA,’ ‘FindNeighbours,’  
703 ‘FindClusters,’ and ‘RunUMAP’. Cluster identities were assigned using published cluster  
704 annotations and plots were generated with ‘DimPlot’ and ‘DotPlot’. The number of cells in each  
705 cluster from each study was then tabulated. ‘Subset’ was utilized to create new fibroblast only  
706 datasets before generating collagen (*COL1A1*, *COL1A2*, *COL8A1*, *COL11A1*, *COL12A1*)  
707 dotplots for *LRRIC15*-expressing (*LRRIC15*>0, Pos) and non-expressing (*LRRIC15* = 0, Neg)  
708 fibroblasts.

709

### 710 **Fibroblast infectivity and viral immobilization assay**

711 *LRRIC15* expression in IMR90 lung fibroblasts were first compared with HEK293T cells by RT-  
712 qPCR. These cells were then transfected with empty *TurboGFP* control and *LRRIC15-TurboGFP*  
713 (Lipofectamine LTX with plus reagent (ThermoScientific)). Cells were checked for Spike  
714 binding activity by incubation with Spike647 and detection via flow cytometry 24 h post-  
715 transduction. Then, these fibroblasts were infected with SARS-CoV-2 pseudovirus as described  
716 above and luciferase luminescence were compared to HEK293T-*ACE2-TMPRSS2* cells.

717

718 For viral immobilization assay, 6,000 HEK293T-*ACE2-TMPRSS2* cells were incubated with  
719 12,000 fibroblasts expressing GFP or *LRRIC15-GFP* and SARS-CoV-2 pseudovirus ( $5 \times 10^8$   
720 particles in polybrene, as described above) for an hour at 37°C before seeding in a 96-well plate.  
721 Transduction was quantified as described above and luminescence was normalized to GFP  
722 controls.

723

### 724 **Quantification of collagen production in fibroblast**

725 5 ng/mL of TGF- $\beta$  (R&D Systems) was added to fibroblasts and incubated for 24 h before  
726 collection for *LRRIC15* and *COL1A1* RT-qPCR. For direct regulation experiments, a total of  
727 1.25  $\mu$ g of plasmid DNA of either *LRRIC15-TurboGFP* fusion construct (Origene, RG225990) or  
728 empty *TurboGFP* control plasmid were transfected into fibroblasts before treatment with spike  
729 and qPCR the following day. 1.25  $\mu$ g empty *TurboGFP* plasmid were transfected for 0  $\mu$ g  
730 *LRRIC15* cells, 0.3125  $\mu$ g *LRRIC15* plasmid was mixed with 0.9375  $\mu$ g empty *TurboGFP*

731 plasmid for Lo LRRC15 cell transfection and 1.25  $\mu$ g *LRRC15-TurboGFP* was transfected for  
732 Hi LRRC15 cells. Cells were collected at 72 h for *COL1A1* RT-qPCR and Western blots as  
733 described above ( $\alpha$ -COL1A1,1:1000;  $\alpha$ -ACTB,1:5000). Densitometry analysis of LRRC15,  
734 COL1A1 and ACTB were performed with ImageJ. Band intensities of LRRC15 and COL1A1  
735 were normalized to ACTB.

736

### 737 **Quantification and statistical analysis**

738 SARS-CoV-2 spike glycoprotein titration experiments were analyzed on GraphPad Prism and  
739 fitted with non-linear regression (one site -- specific binding) to identify maximal binding ( $B_{max}$ )  
740 and dissociation constants ( $K_D$ ). CRISPR activation screen analysis was performed using  
741 MAGeCK (v0.5.9) (Li et al., 2014). For each sample, Z-scores were calculated using normalized  
742 read counts. All density plots were generated using ggplot2. For SARS-CoV-2 pseudovirus and  
743 live virus experiments, data shown reflects 3 independent replicates. For pseudovirus,  
744 normalized level of transduction was calculated by dividing luminescence recorded for control  
745 and LRRC15-transfected cells by luminescence of non-transduced cells of the same cell line.  
746 Similarly, for live virus infection assays, cell death for both control and LRRC15-transfected  
747 cells was normalized to uninfected controls. All RT-qPCR results were analyzed using  $\Delta\Delta C_T$   
748 method. For *COL1A1* RT-qPCR, *COL1A1* expression was normalised to 0  $\mu$ g LRRC15 cells.  
749 Significance for SARS-CoV-2 pseudotyped lentivirus and live virus experiments were analyzed  
750 with two-way ANOVA with Sidak Multiple Comparisons test. For inflammatory cytokine  
751 experiments, *LRRC15* RT-qPCR expression was analyzed with Mann-Whitney One-Tailed test  
752 normalized to control. Co-culture luminescence was analyzed with Mann-Whitney One-tailed  
753 test. *COL1A1* RT-qPCR expression in LRRC15 transfected fibroblasts were normalized to  
754 control cells and analyzed with Kruskal-Wallis with Dunn's Multiple Comparisons test. Western  
755 blot band intensity of COL1A1 and LRRC15 were normalized to ACTB and significance was  
756 determined by One-way ANOVA with Dunnett's Multiple Comparisons test.

757

### 758 **Acknowledgements**

759 We thank Novogene for CRISPRa library sequencing, Sydney Informatics Hub (Artemis HPC)  
760 for single cell data analysis infrastructure, Sydney Cytometry for flow cytometry and FACS  
761 support, the technical and scientific assistance of Sydney Microscopy & Microanalysis, the  
762 University of Sydney node of Microscopy Australia, Dr Megan Steain, Dr Mark Larance, Dr  
763 Sean Humphrey, Dr Gang Liu, Dr Phil Hansboro, Dr Tim Newsome and members of the Neely  
764 lab for helpful discussions. Figure illustrations were created with [BioRender.com](https://BioRender.com).

765

### 766 **Funding**

767 G.N. is funded by the National Health and Medical Research Council (NHMRC) project grants  
768 APP1107514, APP1158164, APP1158165, the NSW Ministry of Health, and a philanthropic  
769 donation from Dr. John and Anne Chong. L.L. is funded by a Dr. John and Anne Chong  
770 Fellowship for Genome Editing and seed funding from the Drug Discovery Initiative at the  
771 University of Sydney

772

### 773 **Author contributions**

774 LL, GGN conceived this project. LL, MW, AJC, AOS performed experiments. LL, MW, AJC,  
775 AOS, DH, GGN performed data analyses. FC facilitated the generation of CRISPRa clonal cell  
776 lines. CLM performed microscopy. MW, CED performed molecular cloning. AA generated

777 ACE2 and ACE2-TMPRSS2 cell lines. ZH performed RT-qPCR. JKKL, KP, RS, JM produced  
778 Spike protein. LL, DH, ST, GGN provided supervision and project administration. LL, MW,  
779 DH, GGN wrote the manuscript with contributions from all authors.

780

781 **Declaration of interests**

782 The authors declare no competing interests.

783

784

785 **Figure Legends**

786

787 **Figure 1 A sensitive FACS-based SARS-CoV-2 Spike binding assay amenable to high**  
788 **Throughput Screening**

789 (A) Schematic of proposed SARS-CoV-2 Spike binding assay. HEK293T cells with stable  
790 integration of *ACE2* cDNA for overexpression (HEK293T-*ACE2*) are incubated with Alexa  
791 Fluor 488-conjugated SARS-CoV-2 Spike protein (Spike488). Spike488-binding cells are then  
792 detected by flow cytometry.

793 (B) Representative flow cytometry plots for *WT* HEK293T and HEK293T-*ACE2* incubated with  
794 Spike488. See also **Supplementary Figure 1B** for gating strategy.

795 (C) Titration of HEK293T-*ACE2* (*ACE2*) cells with *WT* HEK293T cells. 1% HEK293T-*ACE2*  
796 cells showed sufficient difference to baseline non-specific binding, a condition that likely mimics  
797 the real screen condition. Histogram summary showing mean fluorescence intensity (MFI) of  
798 flowed cells.

799 (D) Schematic of CRISPR activation (CRISPRa) system used. HEK293T cells express  
800 synergistic activation machinery (SAM), which includes VP64-dCas9-VP64 protein and helper  
801 proteins MS2, p65 and HSF. When transduced with single guide RNA (sgRNA) plasmids, the  
802 assembled CRISPRa complex uses MS2 stem loops to recruit the MS2-p65-HSF transcriptional  
803 activators. The sgRNA plasmid also encodes the PCP-p65-HSF complex which is recruited to  
804 PP7 aptamers in the sgRNA scaffold.

805 (E) Representative plot of flow cytometry analysis for a clonal HEK293T-CRISPRa cell line  
806 transduced with NTC sgRNA or *ACE2* sgRNA (expression confirmation via RT-qPCR in  
807 **Supplementary Figure 1A**).

808

809 **Figure 2. Whole genome CRISPRa screening identified LRRC15 as a novel SARS-CoV-2**  
810 **Spike-binding protein.**

811 (A) Schematic of CRISPRa screen for identification of novel SARS-CoV-2 Spike-binding  
812 proteins. HEK293T-CRISPRa cells were transduced with a whole genome activation library at  
813 MOI = 0.5 and selected on puromycin. HEK293T-CRISPRa cells incubated with Spike488 were  
814 analyzed by FACS and genomic DNA extracted from both sorted cells and unsorted diversity  
815 control HEK293-CRISPRa cells. Genomic DNA underwent next generation sequencing for gene  
816 enrichment analysis.

817 (B) Ranking of all genes in screen 1 by  $\log_2$  fold change calculated using MAGeCK and plotted  
818 using MAGeCKFlute. See also **Supplementary Table S1**

819 (C) Gene enrichment analysis of Screen 1 performed using MAGeCK. Horizontal dotted line  
820 indicates p-value = 0.05. Vertical dotted lines indicate  $\log_2$  fold changes (LFCs) of -2 and 2. P-  
821 values and LFCs for all genes are reported in **Supplementary Table S1**. Plot generated using  
822 EnhancedVolcano (v1.10.0) R package.

823 (D) sgRNA Z-scores for screen 1 unsorted and sorted samples. Density curve for all sgRNA Z-  
824 scores insample (i.e. sorted or unsorted) is shown in grey. Z-scores for *ACE2* sgRNA are  
825 indicated by vertical blue lines. Z-scores for LRRC15 sgRNAs are indicated by vertical red lines.

826 (E) Flow cytometry analysis of HEK293T-CRISPRa cells transduced with three independent  
827 LRRC15 sgRNAs. HEK293T-*ACE2* (*ACE2* sgRNA3) cells were used as a positive control and  
828 NTC sgRNA-transduced HEK293T-CRISPRa cells were used as a negative control.



829 (F) Quantification of Spike647 binding in *ACE2* sgRNA3 and *LRRC15* sgRNA1 cells via flow  
830 cytometry. Dissociation constant (Kd) was calculated by fitting with non-linear regression (one  
831 site -- specific binding).

832

### 833 **Figure 3 Confirmation of SARS-CoV-2 Spike and LRRC15 interaction**

834 (A) LRRC15 contains 15 leucine-rich repeats, a short cytoplasmic C-terminus, and 2  
835 glycosylation sites.

836 (B) Predicted protein structure of LRRC15.

837 (C) LRRC15 is part of the LRR-Tollkin family of proteins.

838 (D) Flow cytometry analysis of Alexa Fluor-647 (Spike647) binding in WT HEK293T cells, (E)  
839 HEK293T-*ACE2* and (F) HEK293T cells with stable expression of both *ACE2* cDNA and  
840 *TMPRSS2* cDNA (HEK293T-*ACE2-TMPRSS2*). Each cell line was transfected with plasmids  
841 encoding cDNA for GFP-tagged *LRRC15* (transcript 1 or 2) or with empty GFP vector as  
842 negative control plasmid.

843 (G) Histogram summary shows mean fluorescence intensity (MFI) of (D-F).

844 (H) Representative images of interaction between LRRC15-GFP and Alexa Fluor 647-conjugated  
845 SARS-CoV-2 HexaPro Spike protein in HEK293T cells. Images were taken at 40x  
846 magnification. Green = LRRC15-GFP, Red = Spike647, Blue = Hoechst-stained nuclei. Scale  
847 bar = 25  $\mu\text{m}$ .

848 (I) Immunoprecipitation of LRRC15 with Spike protein. Lysates of HEK293T cells transfected  
849 with GFP-tagged LRRC15 (transcript 1 or 2, LRRC15\_1 and LRRC15\_2, respectively)  
850 incubated with SARS-CoV-2 HexaPro Spike protein were immunoprecipitated using anti-  
851 LRRC15 primary antibody. Immunoblots were performed for LRRC15 and for SARS-CoV-2  
852 HexaPro spike. I = input, FT = flow-through, E = elute.

853

### 854 **Fig 4 LRRC15 suppresses SARS-CoV-2 infection.**

855 (A) Luciferase assay for quantification of SARS-CoV-2 pseudovirus infection in (B) WT  
856 HEK293T (n=4) and (C) HEK293T-*ACE2-TMPRSS2* (n=3). Cells were transfected with plasmid  
857 encoding LRRC15 transcript 1 or empty vector as a control. Luminescence for *LRRC15* cells  
858 were normalized to Control cells. Significance was determined by two-way ANOVA, Sidak  
859 multiple comparison test; \*\*\*\*p<0.0001, \*\*\*p<0.001, \*\*p<0.01, \*p<0.05.

860 (D) Cell death assay for quantification of D614G SARS-CoV-2 live virus infection in  
861 HEK293T-*ACE2-TMPRSS2* cells. Cell death was determined via nuclei counts 48 hours after  
862 addition of virus.

863 (E,F) Quantification of cell survival after incubation with (E) D614G (n=4) and (F) Delta (n=3)  
864 SARS-CoV-2 live virus. Significance was determined by two-way ANOVA, \*p<0.05.

865

### 866 **Figure 5 LRRC15 is expressed in lung fibroblasts and protects against virus infection.**

867 (A) Overview of cell types expressing *LRRC15* from existing single cell RNA-sequencing  
868 datasets.

869 (B) UMAP plot of lung single nucleus RNAseq dataset (Melms et al).

870 (C) Feature plot and (D) Dotplot shows *LRRC15* is expressed in fibroblasts and neuronal cells.  
871 Expression of *LRRC15* in fibroblasts is also observed in fibroblasts of separate studies (See  
872 **Supplementary Figure 5**).

873 (E) Fibroblasts have intrinsic spike binding ability that can be further enhanced by LRRC15  
874 overexpression. Fibroblasts were transfected with empty vector control or *LRRC15* cDNA, and  
875 spike binding capacity was quantified via flow cytometry. MFI = Mean Fluorescence Intensity.  
876 (F) Fibroblasts do not have innate tropism for SARS-CoV-2 and overexpression of LRRC15  
877 does not mediate infection. Untransfected, *GFP* and *LRRC15-GFP* transfected fibroblasts were  
878 transduced with  $5 \times 10^8$  SARS-CoV-2 pseudovirus particles for 24 hours before quantification via  
879 luciferase assay. Transduction efficiency (luciferase luminescence) was compared to permissive  
880 cell line HEK293T-*ACE2-TMPRSS2*.  
881 (G) LRRC15 expressing fibroblasts reduced SARS-CoV-2 pseudovirus transduction in  
882 HEK293T-*ACE2-TMPRSS2*. Luminescence of *LRRC15*<sup>+</sup> co-culture was normalized to control  
883 *GFP* co-culture, and significance was determined by Mann-Whitney One-tailed test, \* $p < 0.05$ .  
884

### 885 **Figure 6 LRRC15 controls collagen production.**

886 (A) Pooled analysis of 3 independent studies show increase in fibroblasts proportion in COVID  
887 lungs (7.9% in control (n=19) and 22.9% in COVID (n=47); Unpaired t test,  $p < 0.0001$ ).  
888 (B) *LRRC15*<sup>+</sup> fibroblasts have an enhanced collagen gene signature. Dotplots generated from 3  
889 separate studies. Pos = *LRRC15*<sup>+</sup>, Neg = *LRRC15*<sup>-</sup>.  
890 (C,D) TGF $\beta$  increased *LRRC15* and *COL1A1* in fibroblasts. Quantification of *LRRC15* (C) and  
891 *COL1A1* (D) expression via RT-qPCR. Significance was determined by Mann-Whitney One-  
892 Tailed test, \*\* $p < 0.01$ .  
893 (E,F) LRRC15 regulates *COL1A1* expression. Quantification of *LRRC15* (E) and *COL1A1* (F)  
894 expression in *GFP* control, *Lo LRRC15-GFP* and *Hi LRRC-GFP* fibroblasts via RT-qPCR. *Lo*  
895 *LRRC15* increased *COL1A1* expression. Significance was determined by Kruskal-Wallis with  
896 Dunn's Multiple Comparisons test, compared to control GFP, \* $p < 0.05$ .  
897 (G-I) Bimodal regulation was also confirmed at the protein level. Representative images of  
898 Western blots of LRRC15 and COL1A1 (F, full blots in Supplementary Figure 6). Intensity of  
899 LRRC15 and COL1A1 bands were normalized to their respective  $\beta$ -ACTIN bands. Significance  
900 was determined by One-way ANOVA with Dunnett's Multiple Comparisons test, compared to  
901 control GFP, \*\* $p < 0.01$ .  
902 (J) Summary schematic of LRRC15's role in COVID. Inflammation increase LRRC15 to  
903 immobilize SARS-CoV-2 and regulate collagen production.  
904

### 905 **Supplementary Figure 1. CRISPR activation screen setup.**

906 (A) RT-qPCR of ACE2 expression in 3 SAM clonal cell lines transduced with 3 sgRNAs that  
907 increase expression of ACE2, and with HEK293T-ACE2 cells. Results calculated using  $-\Delta\Delta C_T$   
908 method and normalized to non-targeting control (NTC) sgRNA-transduced HEK293T-CRISPRa  
909 cells.  
910 (B) FACS gating strategy. Cells were first gated by forward (FSC) and side scatter (SSC) before  
911 filtering for singlets. Spike fluorescence was gated by comparison with non-targeting sgRNA  
912 transduced cells. Similar strategy was applied to all flow cytometry experiments.  
913 (C) FACS results for 3 whole genome CRISPRa screens with NTC as negative controls. For  
914 screen 1, cells were incubated with Alexa Fluor 488-conjugated SARS-CoV-2 HexaPro Spike  
915 (Addgene #154754) and selected on puromycin for 3 days. For screen 2, cells were incubated  
916 with Alexa Fluor 488-conjugated SARS-CoV-2 Spike glycoprotein (residues 1-1208, complete  
917 ectodomain; gift from Dr. Florian Krammer) and selected on puromycin for 3 days. For screen 3,

918 cells were incubated with Alexa Fluor 488-conjugated SARS-CoV-2 HexaPro spike (Addgene  
919 #15474) and selected on puromycin for 8 days.

920

### 921 **Supplementary Figure 2. CRISPR screen analysis and validation.**

922 (A-B) Gene enrichment analysis of screens 2 (A) and 3 (B) performed using MAGeCK.  
923 Horizontal dotted line indicates  $p$ -value = 0.05. Vertical dotted lines indicate  $\log_2$  fold changes  
924 (LFCs) of -2 and 2.  $P$ -values and LFCs for all genes in screens 2 and 3 are reported in  
925 **Supplementary Table S1**. Plots were generated using EnhancedVolcano (v1.10.0) R package.

926 (C-D) Density plot of  $Z$ -score (grey) for all sgRNA in (C) screen 2 and (D) screen 3. Blue  
927 vertical lines indicate  $Z$ -score for *ACE2* sgRNAs. Red vertical lines indicate  $Z$ -score for *LRRC15*  
928 sgRNAs.  $Z$ -scores calculated as described in methods.

929 (E)  $\log_2$  fold changes of all genes in Screen 1 vs.  $\log_2$  fold changes of all genes in Screen 2.

930 (F)  $\log_2$  fold changes of all genes in Screen 1 vs.  $\log_2$  fold changes of all genes in Screen 3.

931 (G) *LRRC15* expression of cells in Fig 2E quantified via RT-qPCR.

932 (H) *ACE2* expression was not increased in *LRRC15* sgRNA transduced cells (quantified via RT-  
933 qPCR).

934 (I) The 3 sgRNAs for *ACE2* from the Calabrese library used in our screens were transduced into  
935 HEK293T-CRISPRa cells and *ACE2* expression was confirmed via qPCR. Only sgRNA3  
936 induced upregulation in *ACE2* expression.

937 (J) Transduced cells in (I) were incubated with Spike647 and analyzed via flow cytometry. Only  
938 *ACE2* sgRNA3 cells showed a significant increase in Spike647 binding.

939

### 940 **Supplementary Fig 3. LRRC15 is related to TLRs and interacts with Spike.**

941 (A) Full phylogenetic tree of LRR-Tollkin family of proteins (includes fly and worm orthologs).

942 (B) Co-immunoprecipitation of Spike was observed in *LRRC15*-GFP (transcripts 1 and 2) and  
943 *ACE2* expressing cells but not in control GFP WT cells. I = input, FT = flow-through, E = elute.

944 (C) Control rabbit IgG did not immunoprecipitate *LRRC15* or Spike.

945

### 946 **Supplementary Fig 4. LRRC15 expression inhibits SARS-CoV-2 spike pseudovirus 947 infection in ACE2 expression cells.**

948 (A) SARS-CoV-2 pseudovirus carrying a firefly luciferase cassette was applied to HEK293T,  
949 HEK293T-*ACE2* and HEK293T-*ACE2-TMPRSS2* cells for 24 hours before luminescence  
950 quantification. HEK293T cells were relatively resistant to infection while HEK293T-*ACE2* and  
951 HEK293T-*ACE2-TMPRSS2* expressing cells were infectable.

952 (B) Pseudovirus added to *ACE2*-expressing cells in the context of *LRRC15*. Titration of  $15 \times 10^6$ ,  
953  $62.5 \times 10^6$ ,  $250 \times 10^6$  and  $1000 \times 10^6$  lentiviral particles in HEK293T-*ACE2* cells transfected with 0,  
954 156.25, 312.5, 625, 1250 and 2500 ng of *LRRC15* plasmid DNA.

955 (C) Normalized *LRRC15*-mediated inhibition in HEK293T-*ACE2* cells.

956

### 957 **Supplementary Fig 5. Single cell/nucleus analysis of different studies corroborates 958 restricted LRRC15 expression in fibroblasts.**

959 (A) UMAP plot of lung single nucleus RNAseq dataset (Delorey et al).

960 (B) Feature plot and (C) Dotplot shows *LRRC15* is expressed in Delorey et al. fibroblasts.

961 (D) UMAP plot of lung single nucleus RNAseq dataset (Bharat et al).

962 (E) Feature plot and (F) Dotplot shows *LRRC15* is expressed in Bharat et al. Lymphatic  
963 Endothelial cells and various populations of fibroblasts.

964 (G) IMR90 fibroblasts express *LRRC15*, quantified via RT-qPCR.

965 (H) These fibroblasts have intrinsic spike binding activity.

966 (I) Fibroblasts do not have intrinsic tropism and *LRRC15* is not an entry receptor for SARS-  
967 CoV-2 pseudovirus.

968

969 **Supplementary Fig 6. Bimodal regulation of COL1A1 by LRRC15.**

970 (A) Full western blots of *LRRC15* and *COL1A1* of 3 replicates.

971 (B) Densitometry analysis of endogenous *LRRC1*, normalized to  $\beta$ -ACTIN.

972

973 **Supplementary Table 1: CRISPR activation screen MAGeCK outputs.**

974 Collated output of MAGeCK and MAGeCKFlute pipeline. For each screen, normalized read  
975 counts and Z-scores, gene-level summary, sgRNA-level summary and output of MAGeCKFlute  
976 ReadRRA() function is provided.

977

978 **Supplementary Table 2: Oligonucleotides for CRISPR activation sgRNA constructs**

979 Lists oligonucleotides used for generation of CRISPRa sgRNA constructs. Sequences for each  
980 sgRNA construct were from either Weismann lab Human Genome-wide CRISPRa-v2 Library  
981 (Addgene, #83978) or Calabrese Library Set A (Addgene, #92379).

982

983 **Supplementary Table 3: Next Generation Sequencing Primers**

984 List of primers used for next generation sequencing of gDNA extracted from pooled CRISPR  
985 activation screen samples. Primers were adapted from adapted from Sanson et al. (Sanson et al.,  
986 2018)

987

988 **Supplementary Table 4: RT-qPCR primer sequences**

989 List of primers used for RT-qPCR.

990

991

992

993 **Key Resources Table (KRT)**  
 994

| REAGENT or RESOURCE                                      | SOURCE                      | IDENTIFIER                     |
|----------------------------------------------------------|-----------------------------|--------------------------------|
| <b>Antibodies</b>                                        |                             |                                |
| ACE2 Recombinant Rabbit Monoclonal Antibody (SN0754)     | ThermoFisher Scientific     | MA5-32307<br>RRID:AB_2809589   |
| beta Actin antibody [AC-15]                              | Abcam                       | ab6276-50ul<br>RRID:AB_2223210 |
| Collagen Type I Polyclonal antibody                      | Proteintech Group           | 14695-1-AP<br>RRID:AB_2082037  |
| IRDye® 680RD Goat anti-Mouse IgG Secondary Antibody      | Li-Cor Biosciences          | 926-68070<br>RRID AB_2651128   |
| IRDye® 800CW Goat anti-Rabbit IgG Secondary Antibody     | Li-Cor Biosciences          | 925-32211<br>RRID AB_2651127   |
| Purified Rabbit Polyclonal Isotype Ctrl Antibody         | Covance                     | CTL-4112<br>RRID:AB_2722735    |
| Recombinant Anti-LRRC15 antibody [EPR8188(2)] (ab150376) | Abcam                       | ab150376-100ul                 |
| SARS-CoV / SARS-CoV-2 (COVID-19) spike antibody [1A9]    | GeneTex                     | GTX632604<br>RRID:AB_2864418   |
| <b>Bacterial and virus strains</b>                       |                             |                                |
| DH10B Electrocompetent E. coli                           | Life Technologies Australia | C640003                        |
| NEB® 10-beta Competent E. coli (High Efficiency)         | New England Biolabs         | C3019I                         |
| SARS-CoV-2 B.1.319 (D614G genotype)                      | Turville lab                | NA                             |
| SARS-CoV-2 B.1.617.2 (Delta strain)                      | Turville lab                | NA                             |
| <b>Chemicals, peptides, and recombinant proteins</b>     |                             |                                |
| Ampicillin sodium salt                                   | Sigma-Aldrich               | A9518                          |
| BamHI-HF                                                 | New England Biolabs         | R3136S                         |



|                                                     |                         |                |
|-----------------------------------------------------|-------------------------|----------------|
| Blasticidin S Hydrochloride                         | Merck                   | US1203350-25MG |
| Bovine Serum Albumin                                | Sigma-Aldrich           | A9647          |
| BsmBI-v2                                            | New England Biolabs     | R0739L         |
| Carbenicillin                                       | Merck                   | US169101-3     |
| Dulbecco's Modified Eagle Medium                    | ThermoFisher Scientific | 11995065       |
| Dulbecco's Phosphate Buffered Saline                | Sigma-Aldrich           | D8537          |
| Dynabeads™ Protein G for Immunoprecipitation        | ThermoFisher Scientific | 10003D         |
| EDTA-free Protease Inhibitor Cocktail               | Roche                   | 11873580001    |
| Esp3I                                               | New England Biolabs     | R0734L         |
| Human LRRC15 Protein (ECD, Fc Tag)                  | Sino Biological         | 15786-H02H     |
| HyClone Characterized Fetal Bovine Serum, AU Origin | Cytiva                  | SH30084.03     |
| Igepal-CA-630                                       | Sigma-Aldrich           | I8896          |
| Intercept (TBS) Blocking Buffer                     | LI-COR                  | 927-60001      |
| iScript Select cDNA Synthesis Kit                   | Bio-Rad                 | 1708841        |
| LB Agar, powder (Lennox L agar)                     | Life Technologies       | 22700025       |
| Lipofectamine 3000 Transfection Reagent             | ThermoFisher Scientific | L3000075       |
| Lipofectamine™ LTX with Plus™ Reagent               | ThermoFisher Scientific | 15338100       |
| Luria Broth Base (Miller's LB Broth Base)           | Life Technologies       | 12795084       |
| Matrigel Matrix hESC-Qualified                      | Corning                 | 354277         |

|                                                                       |                         |              |
|-----------------------------------------------------------------------|-------------------------|--------------|
| MluI                                                                  | New England Biolabs     | R0198S       |
| NEBNext High Fidelity 2X PCR Master Mix                               | New England Biolabs     | M0541L       |
| Ni-NTA agarose                                                        | ThermoFisher Scientific | R90115       |
| Non-essential amino acids                                             | Gibco                   | 11140050     |
| NucBlue Live Ready Probes (Hoechst 33342)                             | Invitrogen              | R37605       |
| Opti-MEM I Reduced Serum Medium                                       | Gibco                   | 31985070     |
| Polyethylenimine, Linear, MW 25000, Transfection Grade (PEI 25K™)     | Polysciences Inc.       | 23966        |
| Penicillin-Streptomycin                                               | Gibco                   | 15140122     |
| Polybrene Infection / Transfection Reagent                            | Sigma-Aldrich           | TR-1003      |
| Puromycin dihydrochloride                                             | Gibco                   | A1113803     |
| Recombinant Human TGF-beta 1 Protein                                  | R&D Systems             | 240-B-002/CF |
| SYBR Select Master Mix                                                | ThermoFisher Scientific | 4472908      |
| T4 ligase                                                             | New England Biolabs     | M0202L       |
| TrypLE Express enzyme (1X), phenol red                                | Life Technologies       | 12605028     |
| <b>Critical commercial assays</b>                                     |                         |              |
| Agilent High Sensitivity DNA Kit (Chips and Reagents) For 110 samples | Agilent                 | 5067-4626    |
| Alexa Fluor™ 488 protein labelling kit                                | Invitrogen              | A10235       |
| Alexa Fluor™ 647 protein labelling kit                                | Invitrogen              | A20173       |
| Bicinchoninic acid assay                                              | ThermoFisher Scientific | 23225        |

|                                                                                                       |                         |                             |
|-------------------------------------------------------------------------------------------------------|-------------------------|-----------------------------|
| ISOLATE II Genomic DNA Kit                                                                            | Bioline                 | BIO-52067                   |
| ISOLATE II PCR & Gel Kit                                                                              | Bioline                 | BIO-52060                   |
| ISOLATE II Plasmid Mini Kit                                                                           | Bioline                 | BIO-52067                   |
| ISOLATE II RNA Mini Kit                                                                               | Bioline                 | BIO-52072                   |
| PureYield Plasmid Maxiprep System                                                                     | Promega Corporation     | A2393                       |
| QuickTiter™ Lentivirus Titer Kit (Lentivirus-Associated HIV p24)                                      | Cell Biolabs, Inc       | VPK-107                     |
| Steady-Glo Luciferase Assay System                                                                    | Promega Corporation     | E2520                       |
| <b>Deposited data</b>                                                                                 |                         |                             |
| CRISPR activation screen next-generation sequencing fastq files and processed read counts from MAGeCK | This paper              | GSE186475                   |
| Lung transplantation for patients with severe COVID-19                                                | (Bharat et al., 2020)   | GSE158127                   |
| Single nucleus and single cell transcriptomic analysis of COVID-19 lung samples                       | (Delorey et al., 2021)  | SCP1052                     |
| A molecular single-cell lung atlas of lethal COVID-19                                                 | (Melms et al., 2021)    | SCP1219                     |
| <b>Experimental models: Cell lines</b>                                                                |                         |                             |
| Expi293F™ Cells                                                                                       | ThermoFisher Scientific | A14527<br>RRID:CVCL_D615    |
| HEK293T                                                                                               | ATCC                    | CRL-3216<br>RRID: CVCL_0063 |
| HEK293T-ACE2                                                                                          | (Tea et al., 2021)      | NA                          |
| HEK293T-ACE2-TMPRSS2                                                                                  | (Tea et al., 2021)      | NA                          |
| IMR90 E6E7                                                                                            | (Cesare et al., 2013)   | NA                          |
| <b>Oligonucleotides</b>                                                                               |                         |                             |

|                                                                                                |                                                  |                                        |
|------------------------------------------------------------------------------------------------|--------------------------------------------------|----------------------------------------|
| Oligonucleotides for CRISPR activation sgRNA constructs, see <b>Supplementary Table S2</b>     | This study                                       | NA                                     |
| Next Generation Sequencing Primers, see <b>Supplementary Table S3</b>                          | Adapted from Sanson et al. (Sanson et al., 2018) | NA                                     |
| RT-qPCR primers, see <b>Supplementary Table S4</b>                                             | This study                                       | NA                                     |
| <b>Recombinant DNA</b>                                                                         |                                                  |                                        |
| Human CRISPR Activation Pooled Library (Calabrese P65-HSF)                                     | (Sanson et al., 2018)                            | Addgene #92379<br>RRID:Addgene_92379   |
| LRRC15 (GFP-tagged) - Human leucine rich repeat containing 15 (LRRC15), transcript variant 1   | Origene Technologies                             | RG225990                               |
| LRRC15 (GFP-tagged) - Human leucine rich repeat containing 15 (LRRC15), transcript variant 2   | Origene Technologies                             | RG221437                               |
| LRRC15 (myc-DDK-tagged)-Human leucine rich repeat containing 15 (LRRC15), transcript variant 1 | Origene Technologies                             | RC225990                               |
| LRRC15 (myc-DDK-tagged)-Human leucine rich repeat containing 15 (LRRC15), transcript variant 2 | Origene Technologies                             | RC221437                               |
| pBCKS(HIV-1SDmCMBEGFP-P2A-luc2pre-IIU)                                                         | (Koldej et al., 2005)                            | NA                                     |
| pCAG-VSVg                                                                                      | Arthur Nienhuis & Patrick Salmon                 | Addgene #35616<br>RRID:Addgene_35616   |
| pcDNA3.1tat101ml                                                                               | (Koldej et al., 2005)                            | NA                                     |
| pHCMVgagpolmlstwhv                                                                             | (Koldej et al., 2005)                            | NA                                     |
| pHCMVRevmlwhvpre                                                                               | (Koldej et al., 2005)                            | NA                                     |
| pLJM1-EGFP                                                                                     | (Sancak et al., 2008)                            | Addgene #19319<br>RRID:Addgene_19319   |
| pLVX-IRES-ZsGreen1                                                                             | Clontech                                         | 632187                                 |
| pMD2.G                                                                                         | Trono Lab Packaging and Envelope Plasmids        | Addgene #12259<br>RRID:Addgene_12259   |
| pPB-R1R2_EF1aVP64dCas9VP64_T2A_MS2p65HSF1-IRESbsdpa                                            | (Chong et al., 2018)                             | Addgene #113341<br>RRID:Addgene_113341 |
| pRRLsinPPT.CMV.GFP.WPRE                                                                        | Trono Lab Misc Plasmids                          | Addgene #12252<br>RRID:Addgene_12252   |

|                                                                 |                                           |                                                                                                                                                                                                                                                                                           |
|-----------------------------------------------------------------|-------------------------------------------|-------------------------------------------------------------------------------------------------------------------------------------------------------------------------------------------------------------------------------------------------------------------------------------------|
| pSARS-CoV-2 Spike_018aa_Lenti                                   | (Hoffmann et al., 2020)                   | NA                                                                                                                                                                                                                                                                                        |
| psPAX2                                                          | Trono Lab Packaging and Envelope Plasmids | Addgene #12260<br>RRID:Addgene_12260                                                                                                                                                                                                                                                      |
| pXPR_502                                                        | (Sanson et al., 2018)                     | Addgene #96923<br>RRID:Addgene_96923                                                                                                                                                                                                                                                      |
| SARS-CoV-2 S HexaPro                                            | (Hsieh et al., 2020)                      | Addgene #154754<br>RRID:Addgene_154754                                                                                                                                                                                                                                                    |
| SARS-CoV-2 spike protein (residues 1-1208, complete ectodomain) | Gift from Dr. Florian Krammer             | NA                                                                                                                                                                                                                                                                                        |
| Super PiggyBac Transposase Expression Vector                    | System Biosciences                        | PB210PA-1                                                                                                                                                                                                                                                                                 |
| <b>Software and algorithms</b>                                  |                                           |                                                                                                                                                                                                                                                                                           |
| AlphaFold v2.0                                                  | (Jumper et al., 2021)                     | <a href="https://alphafold.ebi.ac.uk/">https://alphafold.ebi.ac.uk/</a>                                                                                                                                                                                                                   |
| Clustal Omega v1.2.2                                            | (Sievers et al., 2011)                    | <a href="http://www.clustal.org/">http://www.clustal.org/</a>                                                                                                                                                                                                                             |
| EnhancedVolcano v1.10.0                                         | (Blighe, 2018)                            | <a href="https://bioconductor.org/packages/EnhancedVolcano/">https://bioconductor.org/packages/EnhancedVolcano/</a>                                                                                                                                                                       |
| FlowJo                                                          | FlowJo                                    | <a href="https://www.flowjo.com/solutions/flowjo/downloads">https://www.flowjo.com/solutions/flowjo/downloads</a>                                                                                                                                                                         |
| GraphPad Prism 9                                                | GraphPad Software                         | <a href="https://www.graphpad.com/scientific-software/prism/">https://www.graphpad.com/scientific-software/prism/</a>                                                                                                                                                                     |
| Image Studio                                                    | LI-COR                                    | <a href="https://www.licor.com/bio/image-studio/">https://www.licor.com/bio/image-studio/</a>                                                                                                                                                                                             |
| IN Carta Image Analysis Software                                | Cytiva                                    | <a href="https://www.moleculardevices.com/products/cellular-imaging-systems/acquisition-and-analysis-software/in-carta-image-analysis-software">https://www.moleculardevices.com/products/cellular-imaging-systems/acquisition-and-analysis-software/in-carta-image-analysis-software</a> |
| MAGECKFlute v1.12.0                                             | (Wang et al., 2019)                       | <a href="https://www.bioconductor.org/packages/release/bioc/html/MAGECKFlute.html">https://www.bioconductor.org/packages/release/bioc/html/MAGECKFlute.html</a>                                                                                                                           |



|                                                                           |                                |                                                                                                 |
|---------------------------------------------------------------------------|--------------------------------|-------------------------------------------------------------------------------------------------|
| MEGA11                                                                    | (Stecher et al., 2020)         | <a href="http://www.megasoftware.net/">http://www.megasoftware.net/</a>                         |
| Model-based Analysis of Genome-wide CRISPR/Cas9 Knockout (MAGeCK; v0.5.9) | (Li et al., 2014)              | <a href="https://sourceforge.net/projects/mageck/">https://sourceforge.net/projects/mageck/</a> |
| Seurat v4.1.0                                                             | (Hao et al., 2021)             | <a href="https://satijalab.org/seurat/">https://satijalab.org/seurat/</a>                       |
| <b>Other</b>                                                              |                                |                                                                                                 |
| 100K MWCO Pierce Protein Concentrators                                    | Life Technologies<br>Australia | 88533                                                                                           |
| 4–20% Mini-PROTEAN® TGX™ Precast Protein Gels, 15-well, 15 µl             | Bio-rad                        | 4561096                                                                                         |
| Fisherbrand™ Superfrost™ Plus Microscope Slides                           | Fisherbrand                    | 22-037-246                                                                                      |
| HiLoad® 16/600 Superdex® 200 pg                                           | Cytiva                         | GE28-9893-35                                                                                    |
| Superdex® 200 10/300 GL                                                   | Cytiva                         | GE17-5175-01                                                                                    |

995  
996  
997  
998  
999  
1000

## References

- 1001 Aggarwal, A., Iemma, T.L., Shih, I., Newsome, T.P., McAllery, S., Cunningham, A.L., and  
1002 Turville, S.G. (2012). Mobilization of HIV spread by diaphanous 2 dependent filopodia in  
1003 infected dendritic cells. *PLoS Pathog.* 8, e1002762.
- 1004 Baggen, J., Persoons, L., Vanstreels, E., Jansen, S., Van Looveren, D., Boeckx, B., Geudens, V.,  
1005 De Man, J., Jochmans, D., Wauters, J., et al. (2021). Genome-wide CRISPR screening identifies  
1006 TMEM106B as a proviral host factor for SARS-CoV-2. *Nat. Genet.* 53, 435–444.
- 1007 Bharat, A., Querrey, M., Markov, N.S., Kim, S., Kurihara, C., Garza-Castillon, R., Manerikar,  
1008 A., Shilatifard, A., Tomic, R., Politanska, Y., et al. (2020). Lung transplantation for patients with  
1009 severe COVID-19. *Sci. Transl. Med.* 12.
- 1010 Blighe, K. (2018). EnhancedVolcano (Bioconductor).
- 1011 Buechler, M.B., Pradhan, R.N., Krishnamurty, A.T., Cox, C., Calviello, A.K., Wang, A.W.,  
1012 Yang, Y.A., Tam, L., Caothien, R., Roose-Girma, M., et al. (2021). Cross-tissue organization of  
1013 the fibroblast lineage. *Nature* 593, 575–579.

- 1014 Cesare, A.J., Hayashi, M.T., Crabbe, L., and Karlseder, J. (2013). The telomere deprotection  
1015 response is functionally distinct from the genomic DNA damage response. *Mol. Cell* *51*, 141–  
1016 155.
- 1017 Chong, Z.-S., Ohnishi, S., Yusa, K., and Wright, G.J. (2018). Pooled extracellular receptor-  
1018 ligand interaction screening using CRISPR activation. *Genome Biol.* *19*, 205.
- 1019 Daniloski, Z., Jordan, T.X., Wessels, H.-H., Hoagland, D.A., Kasela, S., Legut, M., Maniatis, S.,  
1020 Mimitou, E.P., Lu, L., Geller, E., et al. (2021). Identification of Required Host Factors for  
1021 SARS-CoV-2 Infection in Human Cells. *Cell* *184*, 92–105.e16.
- 1022 Delorey, T.M., Ziegler, C.G.K., Heimberg, G., Normand, R., Yang, Y., Segerstolpe, Å.,  
1023 Abbondanza, D., Fleming, S.J., Subramanian, A., Montoro, D.T., et al. (2021). COVID-19 tissue  
1024 atlases reveal SARS-CoV-2 pathology and cellular targets. *Nature* *595*, 107–113.
- 1025 Dolan, J., Walshe, K., Alsbury, S., Hokamp, K., O’Keeffe, S., Okafuji, T., Miller, S.F.C., Tear,  
1026 G., and Mitchell, K.J. (2007). The extracellular leucine-rich repeat superfamily; a comparative  
1027 survey and analysis of evolutionary relationships and expression patterns. *BMC Genomics* *8*,  
1028 320.
- 1029 Follenzi, A., Battaglia, M., Lombardo, A., Annoni, A., Roncarolo, M.G., and Naldini, L. (2004).  
1030 Targeting lentiviral vector expression to hepatocytes limits transgene-specific immune response  
1031 and establishes long-term expression of human antihemophilic factor IX in mice. *Blood* *103*,  
1032 3700–3709.
- 1033 George, P.M., Wells, A.U., and Jenkins, R.G. (2020). Pulmonary fibrosis and COVID-19: the  
1034 potential role for antifibrotic therapy. *Lancet Respir Med* *8*, 807–815.
- 1035 Goujon, C., Rebendenne, A., Roy, P., Bonaventure, B., Valadao, A.C., Desmarests, L., Rouillé,  
1036 Y., Tauziet, M., Arnaud-Arnould, M., Giovannini, D., et al. (2021). Bidirectional genome-wide  
1037 CRISPR screens reveal host factors regulating SARS-CoV-2, MERS-CoV and seasonal HCoVs.  
1038 *Res Sq*.
- 1039 Hao, Y., Hao, S., Andersen-Nissen, E., Mauck, W.M., 3rd, Zheng, S., Butler, A., Lee, M.J.,  
1040 Wilk, A.J., Darby, C., Zager, M., et al. (2021). Integrated analysis of multimodal single-cell data.  
1041 *Cell* *184*, 3573–3587.e29.
- 1042 Hayashi, F., Smith, K.D., Ozinsky, A., Hawn, T.R., Yi, E.C., Goodlett, D.R., Eng, J.K., Akira,  
1043 S., Underhill, D.M., and Aderem, A. (2001). The innate immune response to bacterial flagellin is  
1044 mediated by Toll-like receptor 5. *Nature* *410*, 1099–1103.
- 1045 Henry, G.H., Malewska, A., Joseph, D.B., Malladi, V.S., Lee, J., Torrealba, J., Mauck, R.J.,  
1046 Gahan, J.C., Raj, G.V., Roehrborn, C.G., et al. (2018). A Cellular Anatomy of the Normal Adult  
1047 Human Prostate and Prostatic Urethra. *Cell Rep.* *25*, 3530–3542.e5.
- 1048 Hoffmann, M., Kleine-Weber, H., and Pöhlmann, S. (2020). A Multibasic Cleavage Site in the  
1049 Spike Protein of SARS-CoV-2 Is Essential for Infection of Human Lung Cells. *Mol. Cell* *78*,  
1050 779–784.e5.

- 1051 Horlbeck, M.A., Gilbert, L.A., Villalta, J.E., Adamson, B., Pak, R.A., Chen, Y., Fields, A.P.,  
1052 Park, C.Y., Corn, J.E., Kampmann, M., et al. (2016). Compact and highly active next-generation  
1053 libraries for CRISPR-mediated gene repression and activation. *Elife* 5.
- 1054 Hsieh, C.-L., Goldsmith, J.A., Schaub, J.M., DiVenere, A.M., Kuo, H.-C., Javanmardi, K., Le,  
1055 K.C., Wrapp, D., Lee, A.G., Liu, Y., et al. (2020). Structure-based design of prefusion-stabilized  
1056 SARS-CoV-2 spikes. *Science* 369, 1501–1505.
- 1057 Huang, N., Pérez, P., Kato, T., Mikami, Y., Okuda, K., Gilmore, R.C., Conde, C.D., Gasmi, B.,  
1058 Stein, S., Beach, M., et al. (2021). SARS-CoV-2 infection of the oral cavity and saliva. *Nat.*  
1059 *Med.* 27, 892–903.
- 1060 Jia, H.P., Look, D.C., Shi, L., Hickey, M., Pewe, L., Netland, J., Farzan, M., Wohlford-Lenane,  
1061 C., Perlman, S., and McCray, P.B., Jr (2005). ACE2 receptor expression and severe acute  
1062 respiratory syndrome coronavirus infection depend on differentiation of human airway epithelia.  
1063 *J. Virol.* 79, 14614–14621.
- 1064 Jumper, J., Evans, R., Pritzel, A., Green, T., Figurnov, M., Ronneberger, O., Tunyasuvunakool,  
1065 K., Bates, R., Žídek, A., Potapenko, A., et al. (2021). Highly accurate protein structure prediction  
1066 with AlphaFold. *Nature* 596, 583–589.
- 1067 Koldej, R., Cmielewski, P., Stocker, A., Parsons, D.W., and Anson, D.S. (2005). Optimisation of  
1068 a multipartite human immunodeficiency virus based vector system; control of virus infectivity  
1069 and large-scale production. *J. Gene Med.* 7, 1390–1399.
- 1070 Kuba, K., Imai, Y., Rao, S., Gao, H., Guo, F., Guan, B., Huan, Y., Yang, P., Zhang, Y., Deng,  
1071 W., et al. (2005). A crucial role of angiotensin converting enzyme 2 (ACE2) in SARS  
1072 coronavirus-induced lung injury. *Nat. Med.* 11, 875–879.
- 1073 Lan, J., Ge, J., Yu, J., Shan, S., Zhou, H., Fan, S., Zhang, Q., Shi, X., Wang, Q., Zhang, L., et al.  
1074 (2020). Structure of the SARS-CoV-2 spike receptor-binding domain bound to the ACE2  
1075 receptor. *Nature* 581, 215–220.
- 1076 Li, W., Moore, M.J., Vasilieva, N., Sui, J., Wong, S.K., Berne, M.A., Somasundaran, M.,  
1077 Sullivan, J.L., Luzuriaga, K., Greenough, T.C., et al. (2003). Angiotensin-converting enzyme 2 is  
1078 a functional receptor for the SARS coronavirus. *Nature* 426, 450–454.
- 1079 Li, W., Xu, H., Xiao, T., Cong, L., Love, M.I., Zhang, F., Irizarry, R.A., Liu, J.S., Brown, M.,  
1080 and Liu, X.S. (2014). MAGECK enables robust identification of essential genes from genome-  
1081 scale CRISPR/Cas9 knockout screens. *Genome Biol.* 15, 554.
- 1082 Lu, R., Zhao, X., Li, J., Niu, P., Yang, B., Wu, H., Wang, W., Song, H., Huang, B., Zhu, N., et  
1083 al. (2020). Genomic characterisation and epidemiology of 2019 novel coronavirus: implications  
1084 for virus origins and receptor binding. *Lancet* 395, 565–574.
- 1085 Madisson, E., Wilbrey-Clark, A., Miragaia, R.J., Saeb-Parsy, K., Mahbubani, K.T.,  
1086 Georgakopoulos, N., Harding, P., Polanski, K., Huang, N., Nowicki-Osuch, K., et al. (2019).  
1087 scRNA-seq assessment of the human lung, spleen, and esophagus tissue stability after cold

- 1088 preservation. *Genome Biol.* 21, 1.
- 1089 Martin, J.C., Chang, C., Boschetti, G., Ungaro, R., Giri, M., Grout, J.A., Gettler, K., Chuang, L.-  
1090 S., Nayar, S., Greenstein, A.J., et al. (2019). Single-Cell Analysis of Crohn's Disease Lesions  
1091 Identifies a Pathogenic Cellular Module Associated with Resistance to Anti-TNF Therapy. *Cell*  
1092 178, 1493–1508.e20.
- 1093 Melms, J.C., Biermann, J., Huang, H., Wang, Y., Nair, A., Tagore, S., Katsyv, I., Rendeiro, A.F.,  
1094 Amin, A.D., Schapiro, D., et al. (2021). A molecular single-cell lung atlas of lethal COVID-19.  
1095 *Nature* 595, 114–119.
- 1096 Neil, S.J.D., Zang, T., and Bieniasz, P.D. (2008). Tetherin inhibits retrovirus release and is  
1097 antagonized by HIV-1 Vpu. *Nature* 451, 425–430.
- 1098 O'Prey, J., Wilkinson, S., and Ryan, K.M. (2008). Tumor antigen LRRC15 impedes adenoviral  
1099 infection: implications for virus-based cancer therapy. *J. Virol.* 82, 5933–5939.
- 1100 Park, J.-E., Botting, R.A., Domínguez Conde, C., Popescu, D.-M., Lavaert, M., Kunz, D.J., Goh,  
1101 I., Stephenson, E., Ragazzini, R., Tuck, E., et al. (2020). A cell atlas of human thymic  
1102 development defines T cell repertoire formation. *Science* 367.
- 1103 Rendeiro, A.F., Ravichandran, H., Bram, Y., Chandar, V., Kim, J., Meydan, C., Park, J., Foon,  
1104 J., Hether, T., Warren, S., et al. (2021). The spatial landscape of lung pathology during COVID-  
1105 19 progression. *Nature* 593, 564–569.
- 1106 Sancak, Y., Peterson, T.R., Shaul, Y.D., Lindquist, R.A., Thoreen, C.C., Bar-Peled, L., and  
1107 Sabatini, D.M. (2008). The Rag GTPases bind raptor and mediate amino acid signaling to  
1108 mTORC1. *Science* 320, 1496–1501.
- 1109 Sanson, K.R., Hanna, R.E., Hegde, M., Donovan, K.F., Strand, C., Sullender, M.E., Vaimberg,  
1110 E.W., Goodale, A., Root, D.E., Piccioni, F., et al. (2018). Optimized libraries for CRISPR-Cas9  
1111 genetic screens with multiple modalities. *Nat. Commun.* 9, 5416.
- 1112 Satoh, K., Hata, M., and Yokota, H. (2002). A novel member of the leucine-rich repeat  
1113 superfamily induced in rat astrocytes by beta-amyloid. *Biochem. Biophys. Res. Commun.* 290,  
1114 756–762.
- 1115 Schneider, W.M., Luna, J.M., Hoffmann, H.-H., Sánchez-Rivera, F.J., Leal, A.A., Ashbrook,  
1116 A.W., Le Pen, J., Ricardo-Lax, I., Michailidis, E., Peace, A., et al. (2021). Genome-Scale  
1117 Identification of SARS-CoV-2 and Pan-coronavirus Host Factor Networks. *Cell* 184, 120–  
1118 132.e14.
- 1119 Shilts, J., Crozier, T.W.M., Teixeira-Silva, A., Gabaev, I., Greenwood, E.J.D., Watson, S.J.,  
1120 Ortmann, B.M., Gawden-Bone, C.M., Pauzaitė, T., Hoffmann, M., et al. (2021). LRRC15  
1121 mediates an accessory interaction with the SARS-CoV-2 spike protein. *bioRxiv*  
1122 2021.09.25.461776; doi: <https://doi.org/10.1101/2021.09.25.461776>.
- 1123 Sievers, F., Wilm, A., Dineen, D., Gibson, T.J., Karplus, K., Li, W., Lopez, R., McWilliam, H.,

- 1124 Remmert, M., Söding, J., et al. (2011). Fast, scalable generation of high-quality protein multiple  
1125 sequence alignments using Clustal Omega. *Mol. Syst. Biol.* 7, 539.
- 1126 Spandidos, A., Wang, X., Wang, H., and Seed, B. (2010). PrimerBank: a resource of human and  
1127 mouse PCR primer pairs for gene expression detection and quantification. *Nucleic Acids Res.*  
1128 38, D792–D799.
- 1129 Solé-Boldo, L., Raddatz, G., Schütz, S., Mallm, J.-P., Rippe, K., Lonsdorf, A.S., Rodríguez-  
1130 Paredes, M., and Lyko, F. (2020). Single-cell transcriptomes of the human skin reveal age-  
1131 related loss of fibroblast priming. *Commun Biol* 3, 188.
- 1132 Stecher, G., Tamura, K., and Kumar, S. (2020). Molecular Evolutionary Genetics Analysis  
1133 (MEGA) for macOS. *Mol. Biol. Evol.* 37, 1237–1239.
- 1134 Tea, F., Ospina Stella, A., Aggarwal, A., Ross Darley, D., Pilli, D., Vitale, D., Merheb, V., Lee,  
1135 F.X.Z., Cunningham, P., Walker, G.J., et al. (2021). SARS-CoV-2 neutralizing antibodies:  
1136 Longevity, breadth, and evasion by emerging viral variants. *PLoS Med.* 18, e1003656.
- 1137 Uhlén, M., Fagerberg, L., Hallström, B.M., Lindskog, C., Oksvold, P., Mardinoglu, A.,  
1138 Sivertsson, Å., Kampf, C., Sjöstedt, E., Asplund, A., et al. (2015). Proteomics. Tissue-based map  
1139 of the human proteome. *Science* 347, 1260419.
- 1140 UniProt Consortium (2021). UniProt: the universal protein knowledgebase in 2021. *Nucleic*  
1141 *Acids Res.* 49, D480–D489.
- 1142 Vento-Tormo, R., Efremova, M., Botting, R.A., Turco, M.Y., Vento-Tormo, M., Meyer, K.B.,  
1143 Park, J.-E., Stephenson, E., Polański, K., Goncalves, A., et al. (2018). Single-cell reconstruction  
1144 of the early maternal-fetal interface in humans. *Nature* 563, 347–353.
- 1145 Vieira Braga, F.A., Kar, G., Berg, M., Carpaij, O.A., Polanski, K., Simon, L.M., Brouwer, S.,  
1146 Gomes, T., Hesse, L., Jiang, J., et al. (2019). A cellular census of human lungs identifies novel  
1147 cell states in health and in asthma. *Nat. Med.* 25, 1153–1163.
- 1148 Wang, B., Wang, M., Zhang, W., Xiao, T., Chen, C.-H., Wu, A., Wu, F., Traugh, N., Wang, X.,  
1149 Li, Z., et al. (2019). Integrative analysis of pooled CRISPR genetic screens using  
1150 MAGeCKFlute. *Nat. Protoc.* 14, 756–780.
- 1151 Wang, Q., Zhang, Y., Wu, L., Niu, S., Song, C., Zhang, Z., Lu, G., Qiao, C., Hu, Y., Yuen, K.-  
1152 Y., et al. (2020). Structural and Functional Basis of SARS-CoV-2 Entry by Using Human ACE2.  
1153 *Cell* 181, 894–904.e9.
- 1154 Wang, R., Simoneau, C.R., Kulsuptrakul, J., Bouhaddou, M., Travisano, K.A., Hayashi, J.M.,  
1155 Carlson-Stevermer, J., Zengel, J.R., Richards, C.M., Fozouni, P., et al. (2021). Genetic Screens  
1156 Identify Host Factors for SARS-CoV-2 and Common Cold Coronaviruses. *Cell* 184, 106–  
1157 119.e14.
- 1158 Wang, Y., Liu, Y., Zhang, M., Lv, L., Zhang, X., Zhang, P., and Zhou, Y. (2018). LRRC15  
1159 promotes osteogenic differentiation of mesenchymal stem cells by modulating p65



- 1160 cytoplasmic/nuclear translocation. *Stem Cell Res. Ther.* 9, 65.
- 1161 Wei, J., Alfajaro, M.M., DeWeirdt, P.C., Hanna, R.E., Lu-Culligan, W.J., Cai, W.L., Strine,  
1162 M.S., Zhang, S.-M., Graziano, V.R., Schmitz, C.O., et al. (2021). Genome-wide CRISPR  
1163 Screens Reveal Host Factors Critical for SARS-CoV-2 Infection. *Cell* 184, 76–91.e13.
- 1164 Wrapp, D., Wang, N., Corbett, K.S., Goldsmith, J.A., Hsieh, C.-L., Abiona, O., Graham, B.S.,  
1165 and McLellan, J.S. (2020). Cryo-EM structure of the 2019-nCoV spike in the prefusion  
1166 conformation. *Science* 367, 1260–1263.
- 1167 Zhou, P., Yang, X.-L., Wang, X.-G., Hu, B., Zhang, L., Zhang, W., Si, H.-R., Zhu, Y., Li, B.,  
1168 Huang, C.-L., et al. (2020). A pneumonia outbreak associated with a new coronavirus of  
1169 probable bat origin. *Nature* 579, 270–273.
- 1170 Zhu, S., Liu, Y., Zhou, Z., Zhang, Z., Xiao, X., Liu, Z., Chen, A., Dong, X., Tian, F., Chen, S., et  
1171 al. (2021). Genome-wide CRISPR activation screen identifies candidate receptors for SARS-  
1172 CoV-2 entry. *Sci. China Life Sci.*

---

1173  
1174  
1175  
1176  
1177  
1178  
1179

**A**

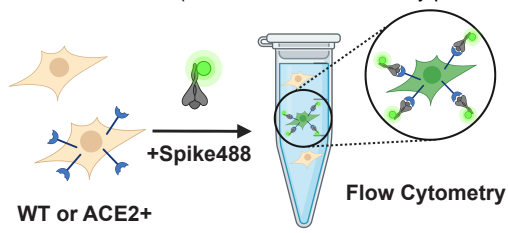

**B**

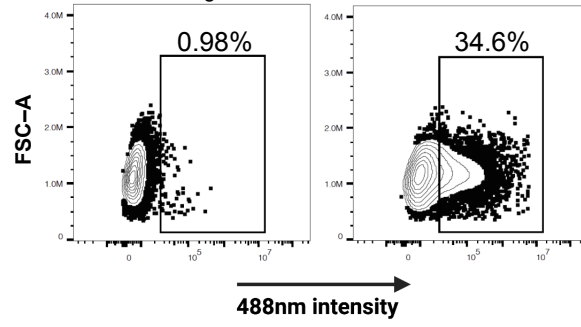

**C**

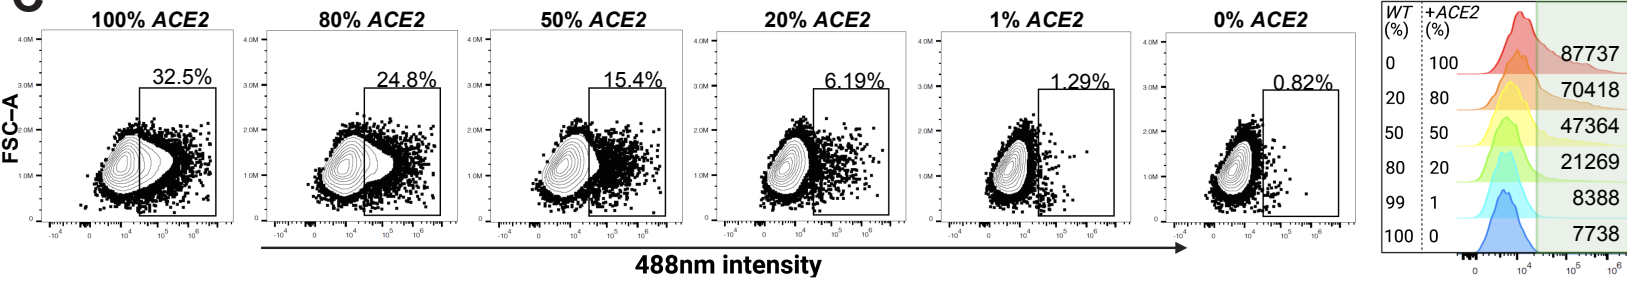

**D**

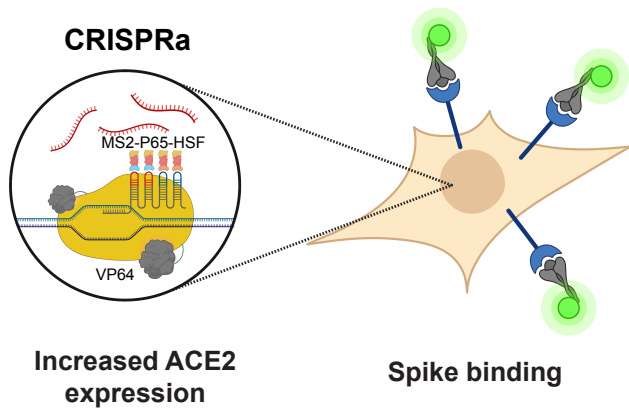

**E**

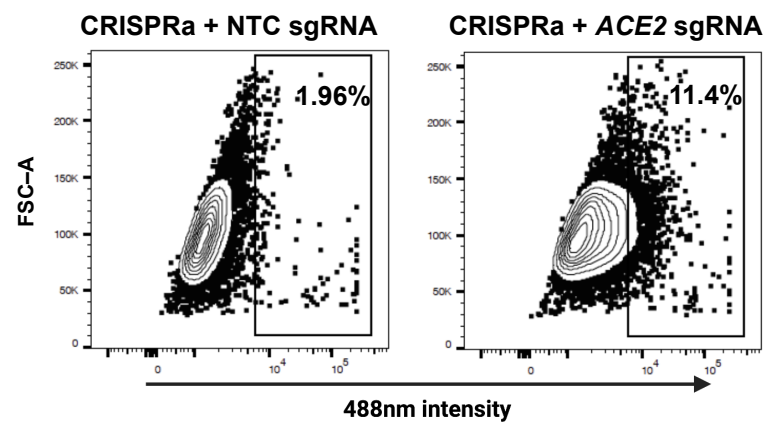

**A**

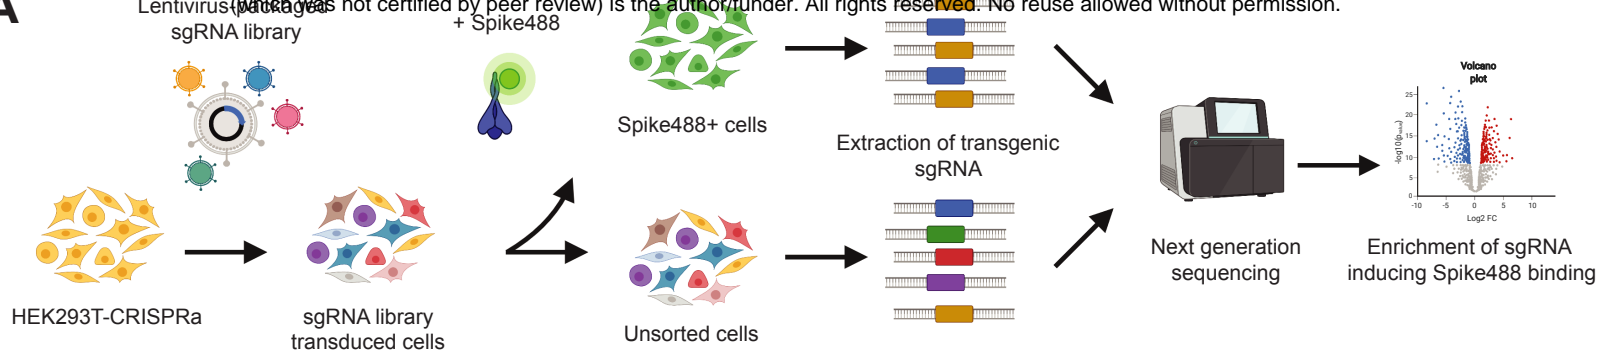

**B**

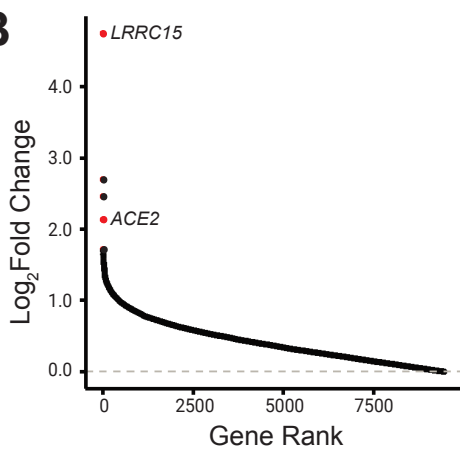

**C**

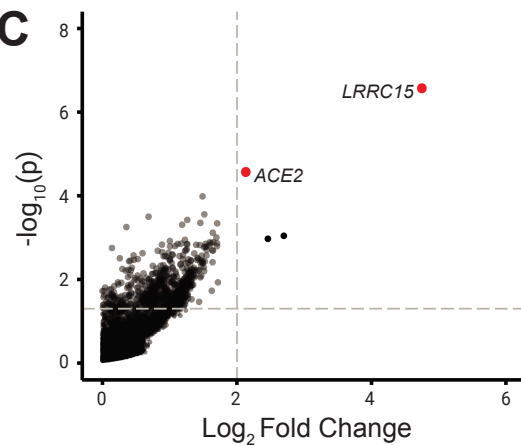

**D**

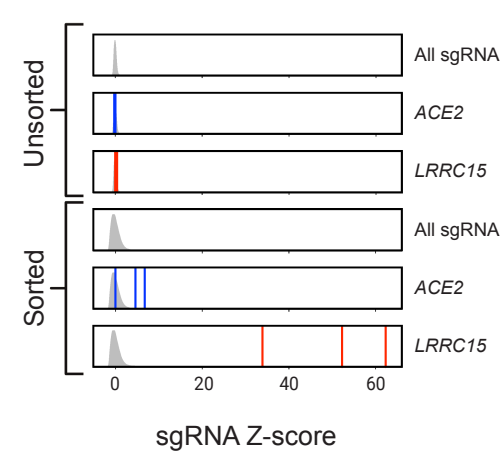

**E**

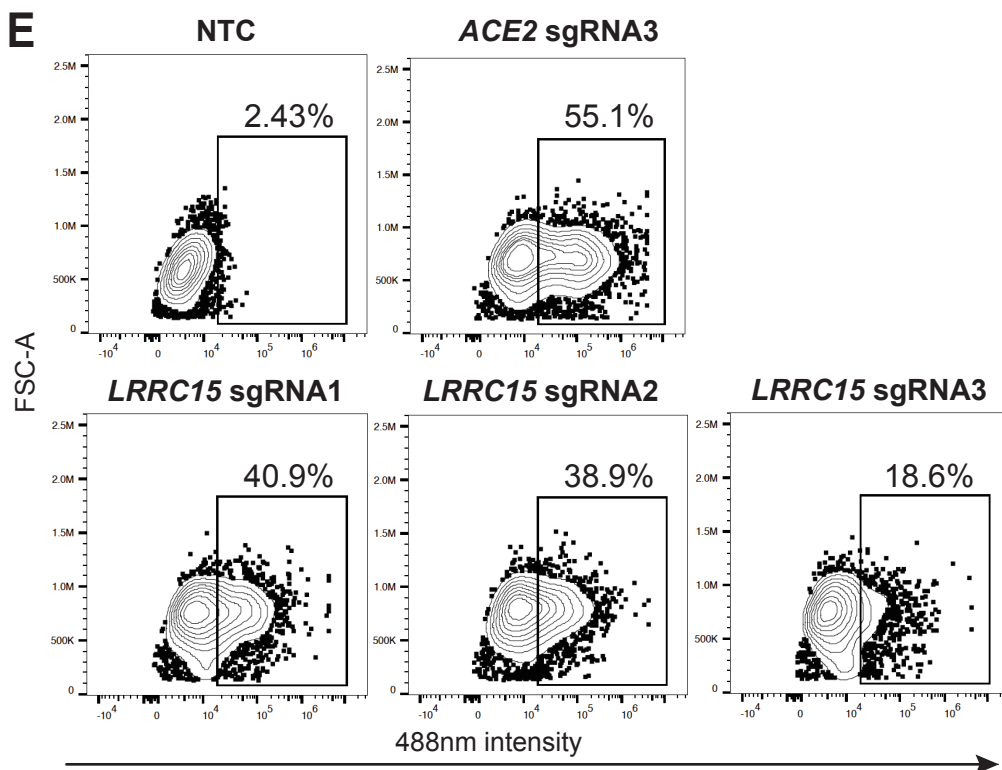

**F**

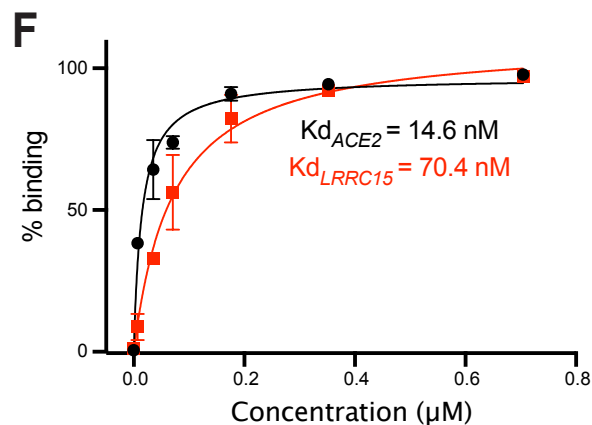

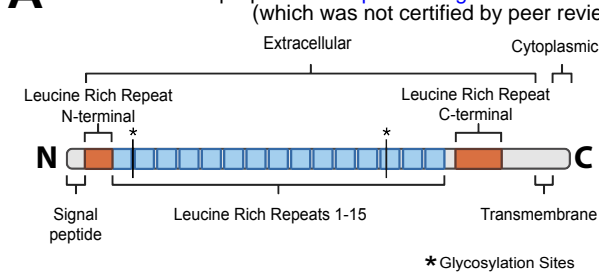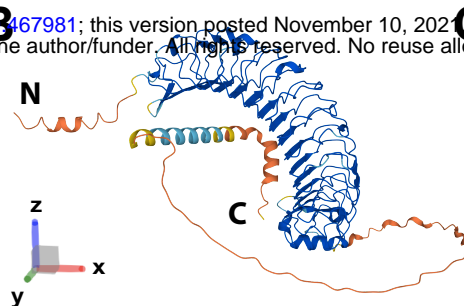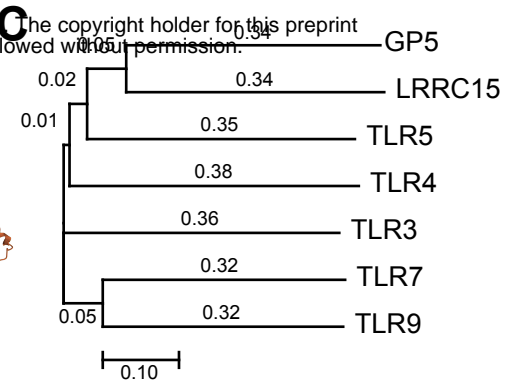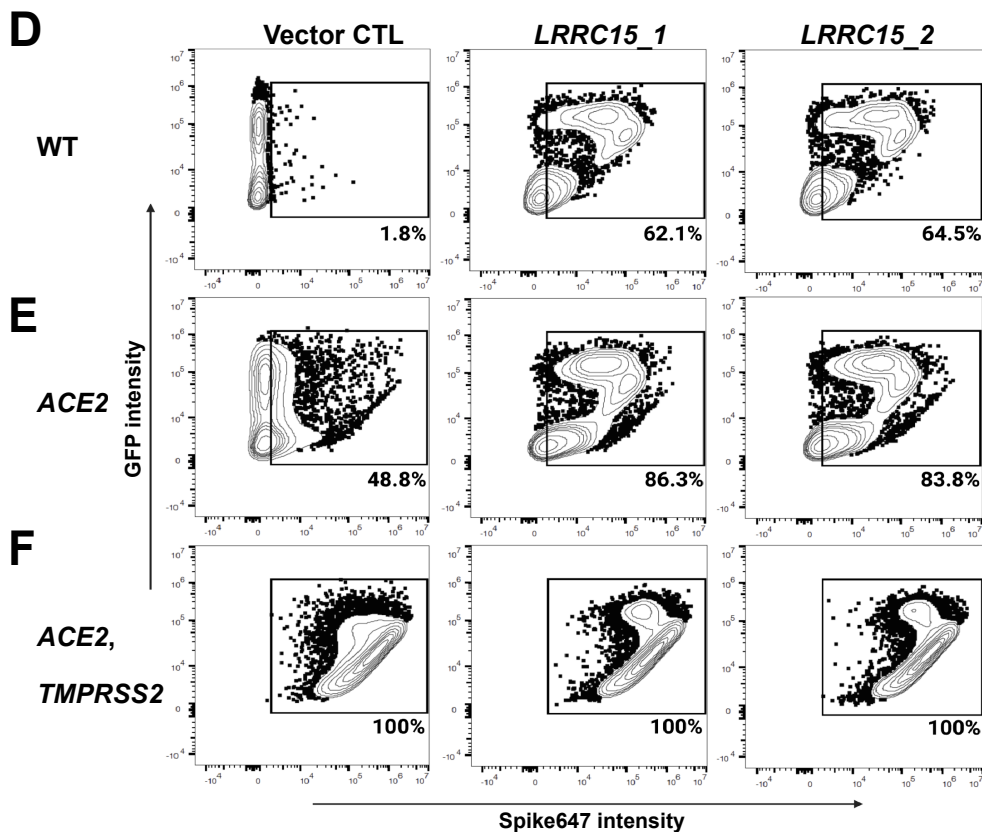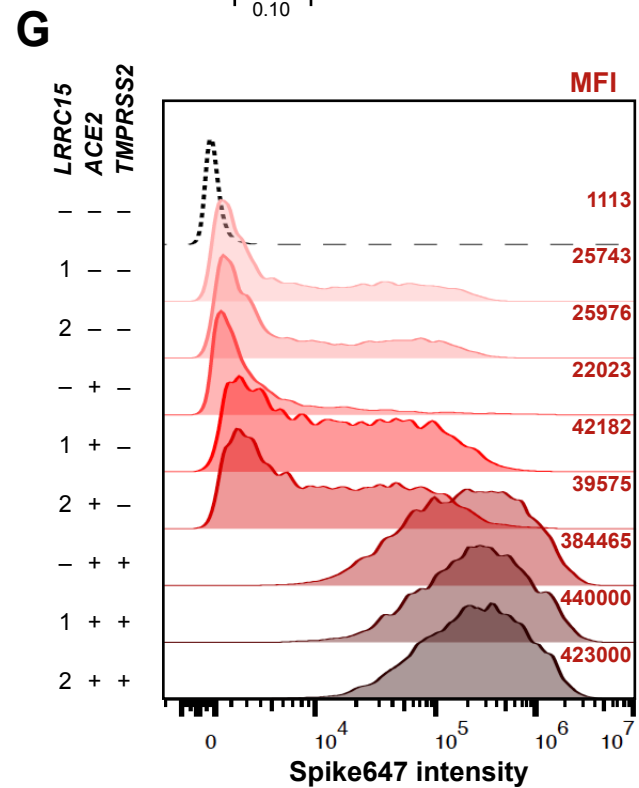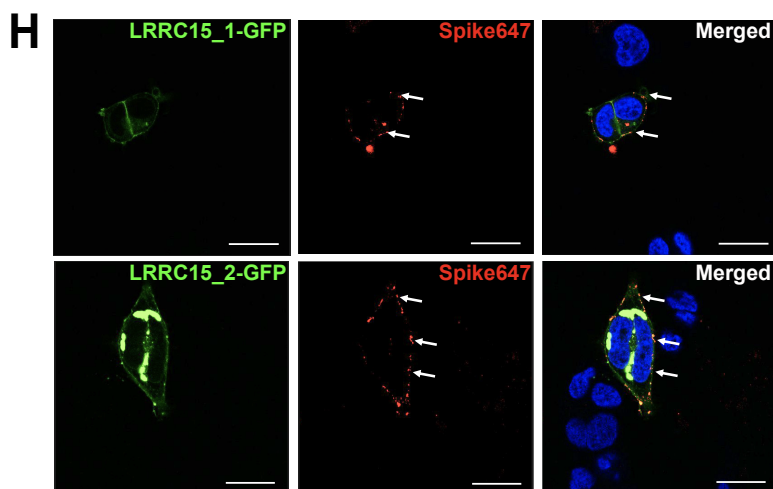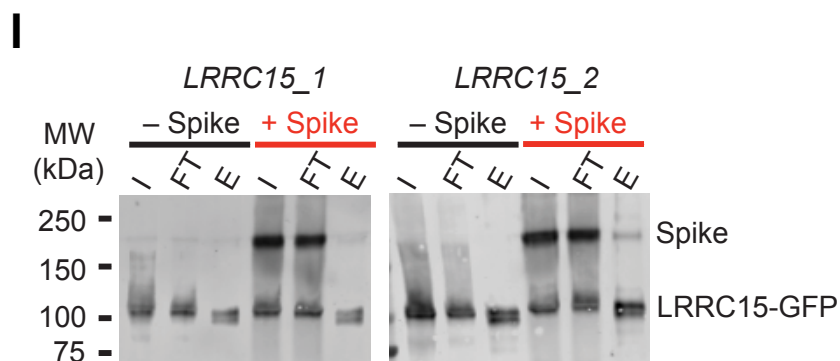

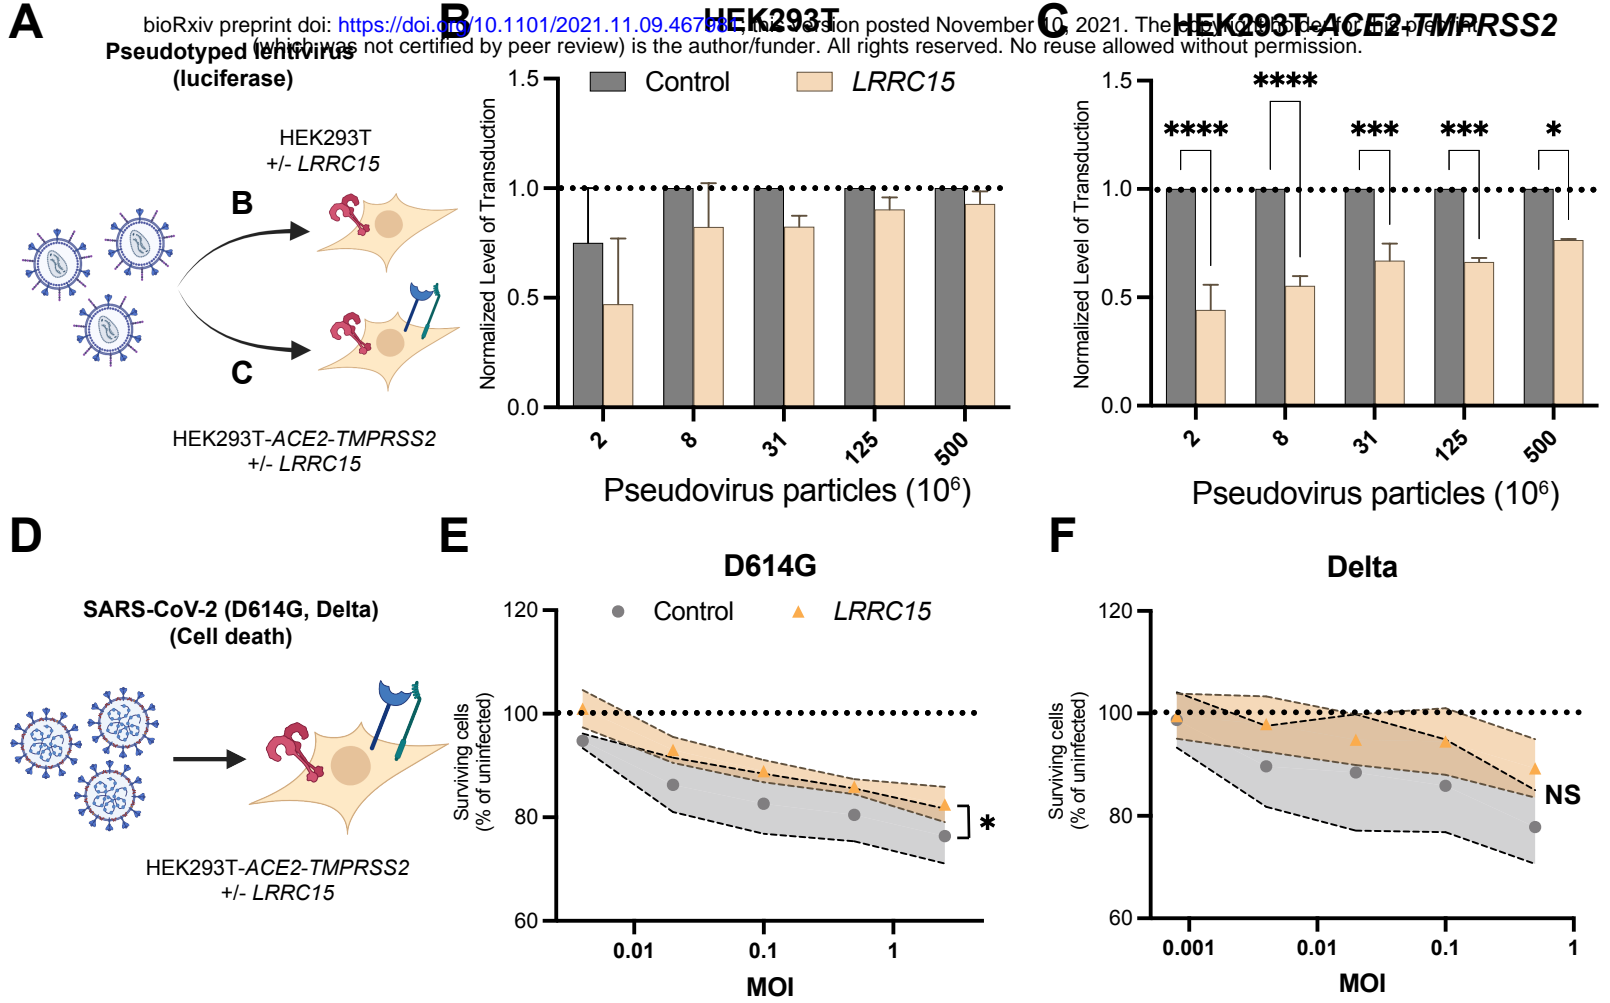



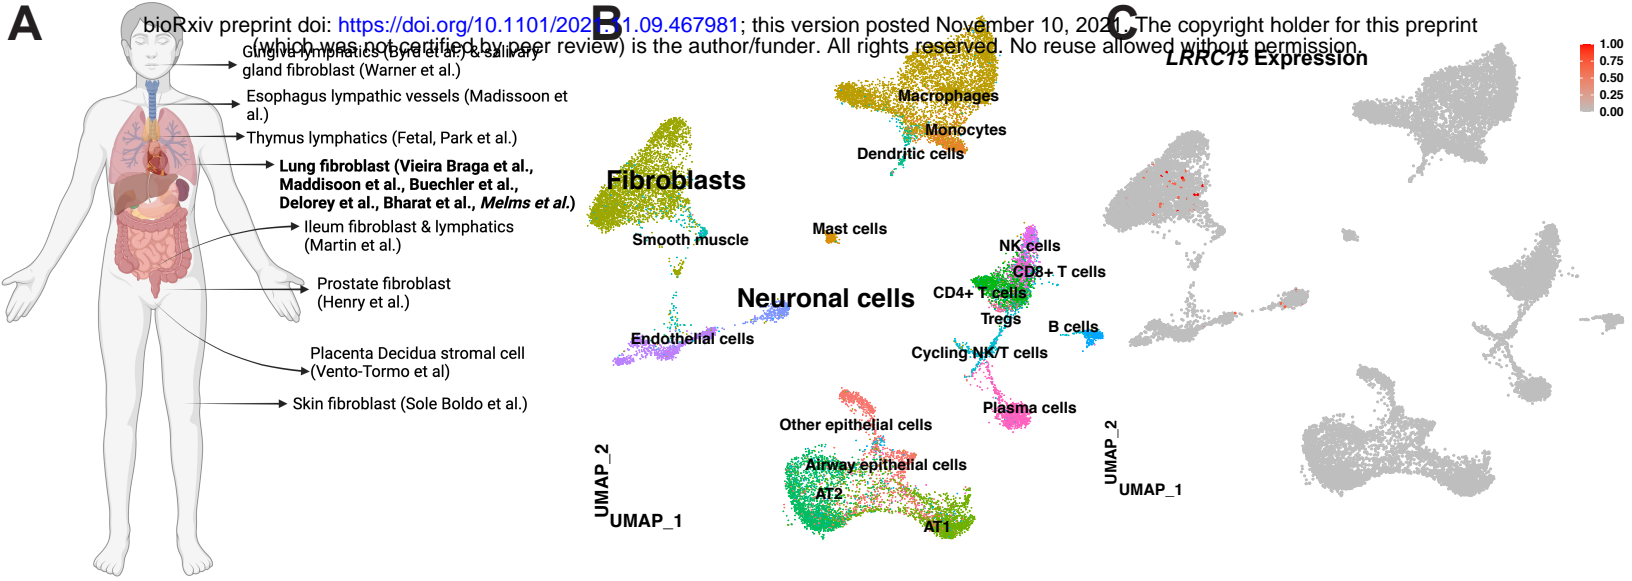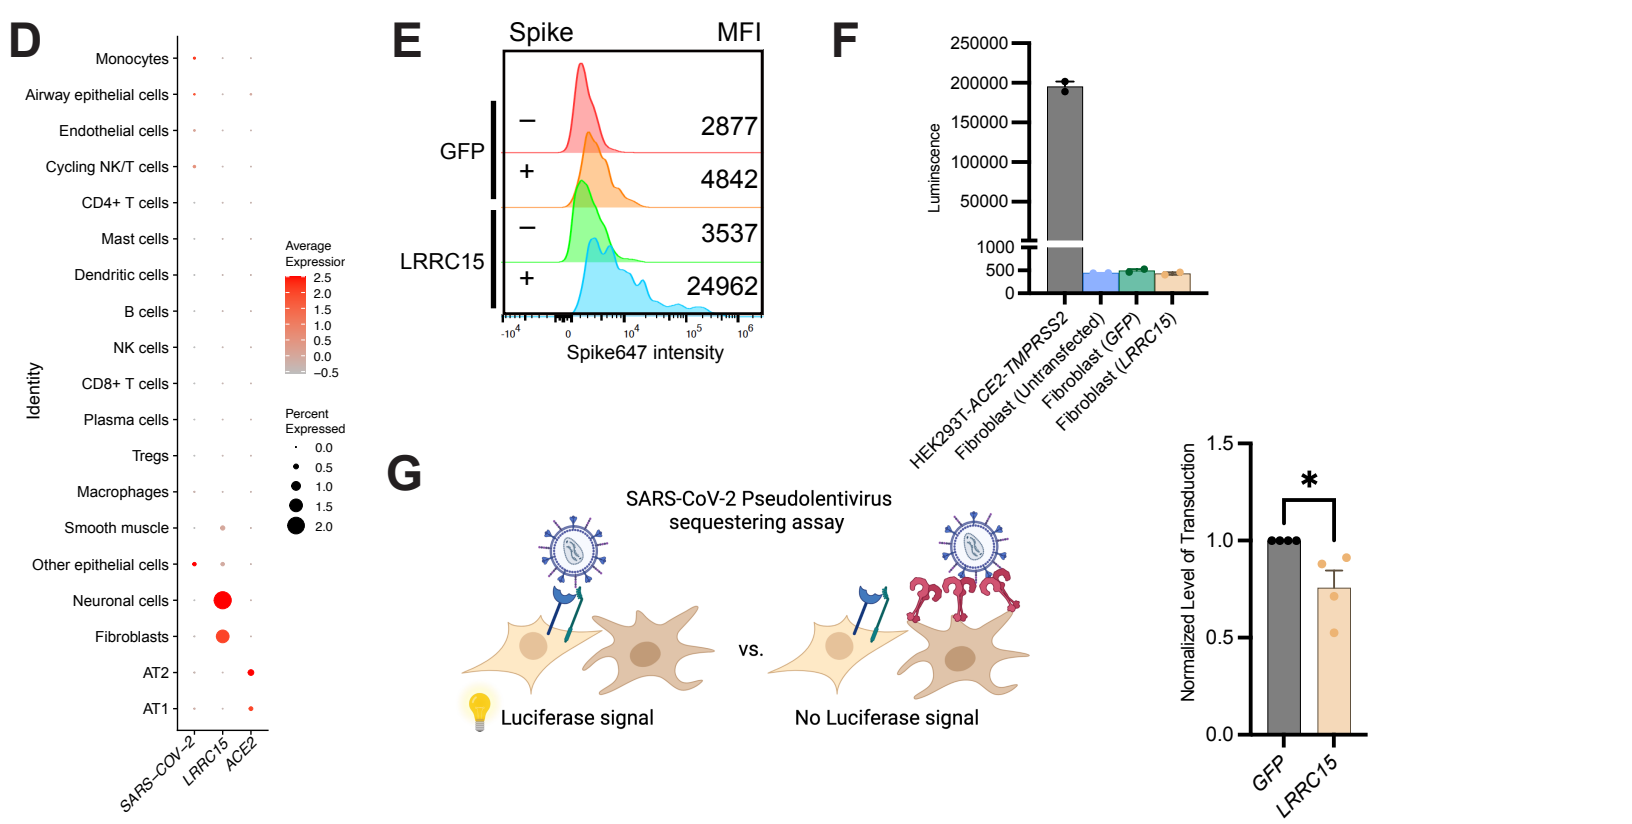

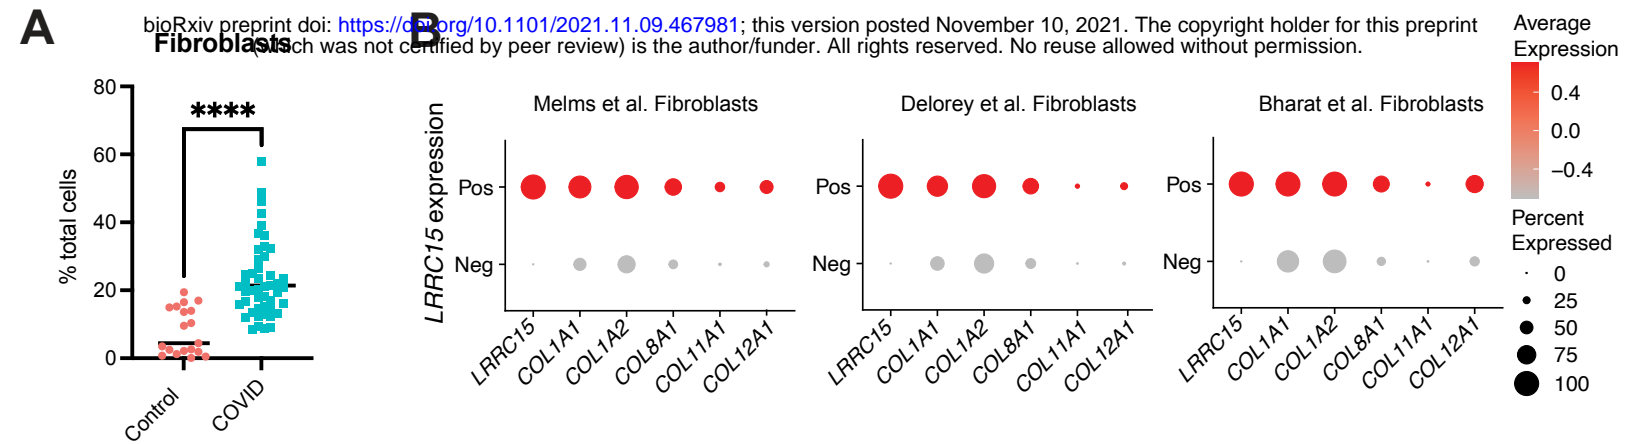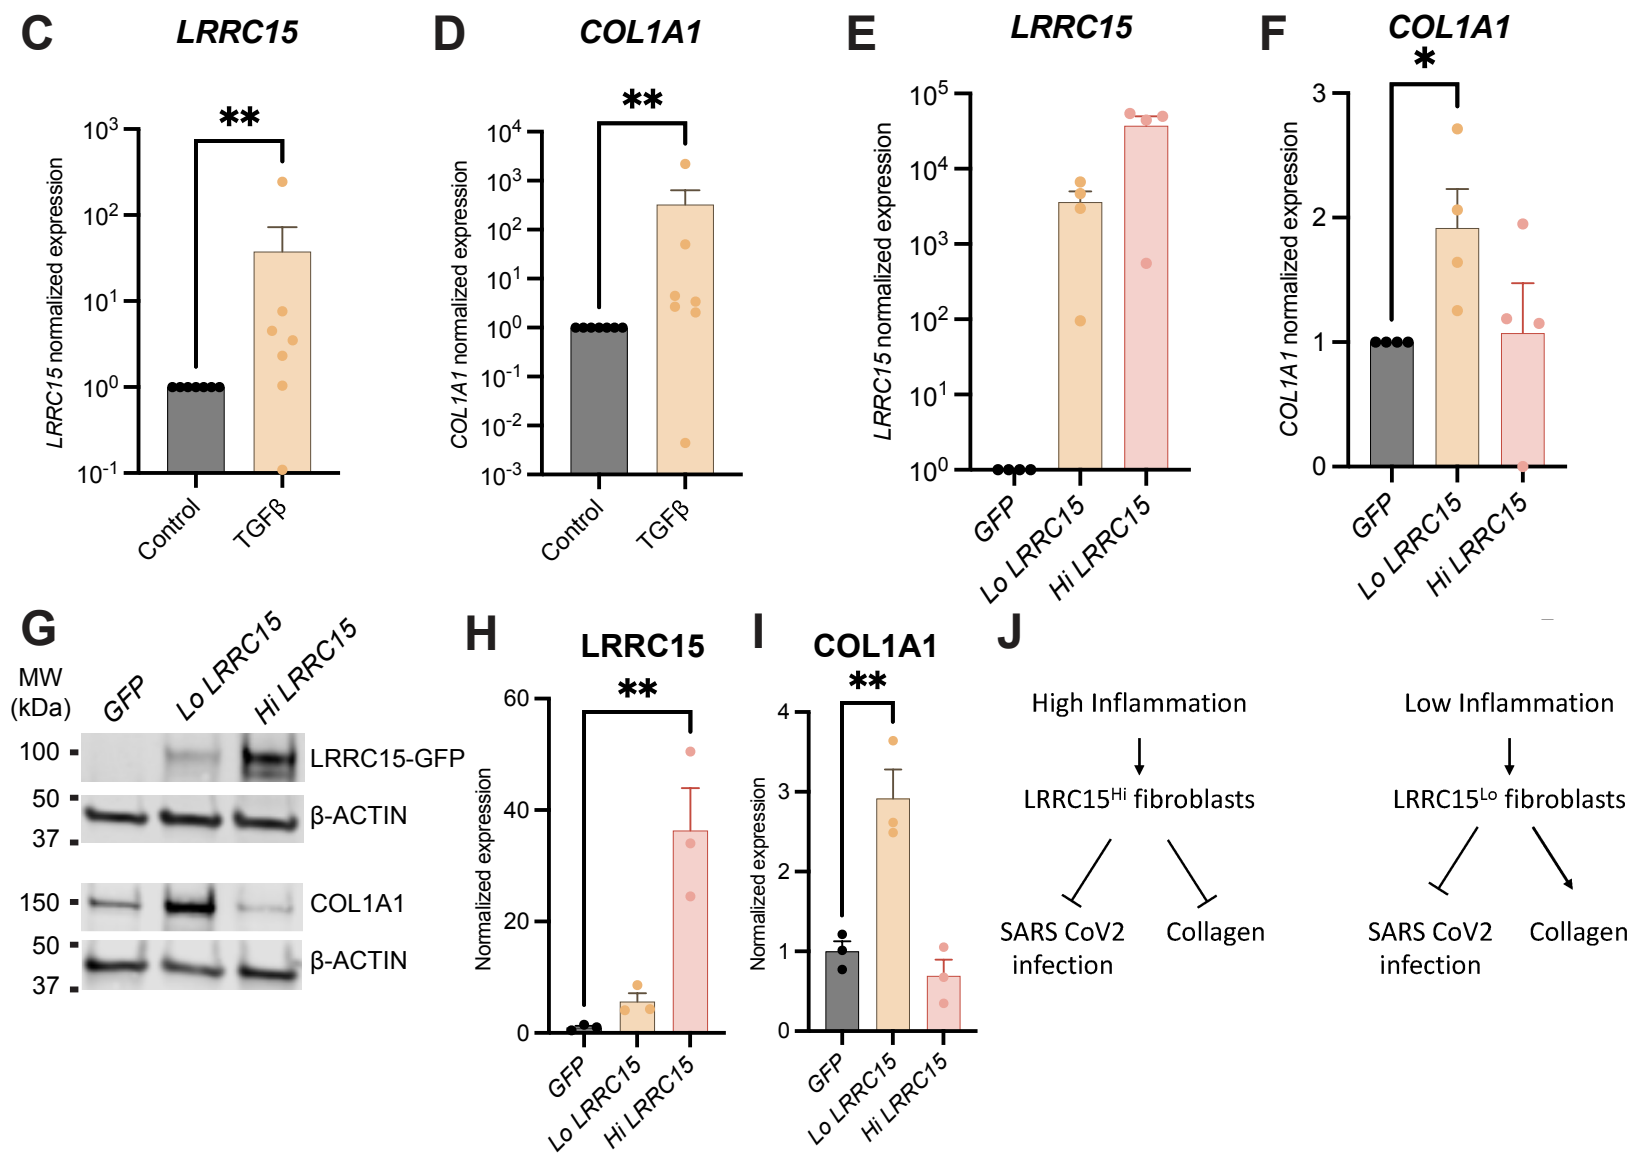

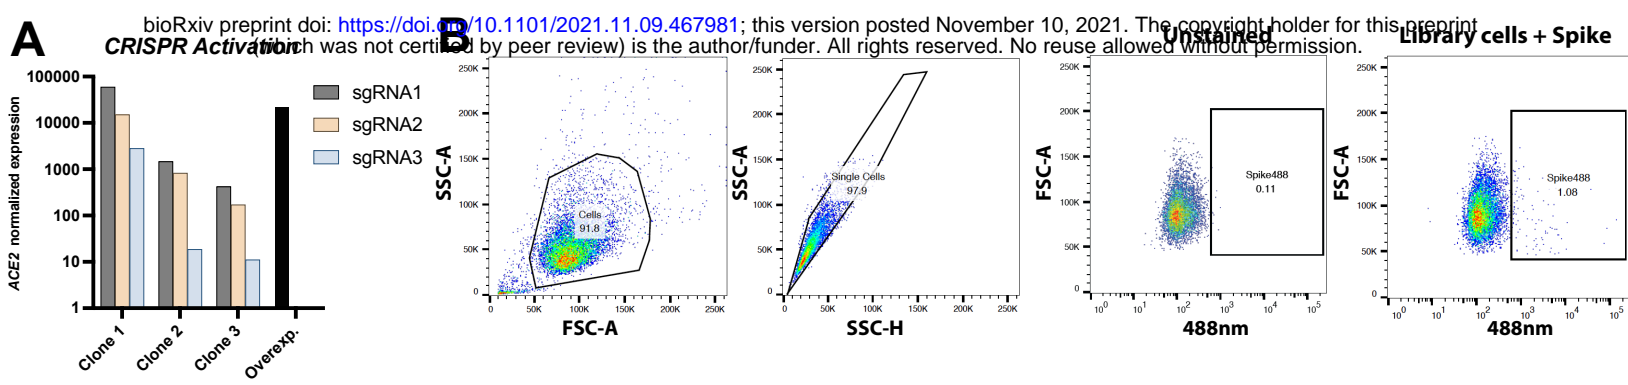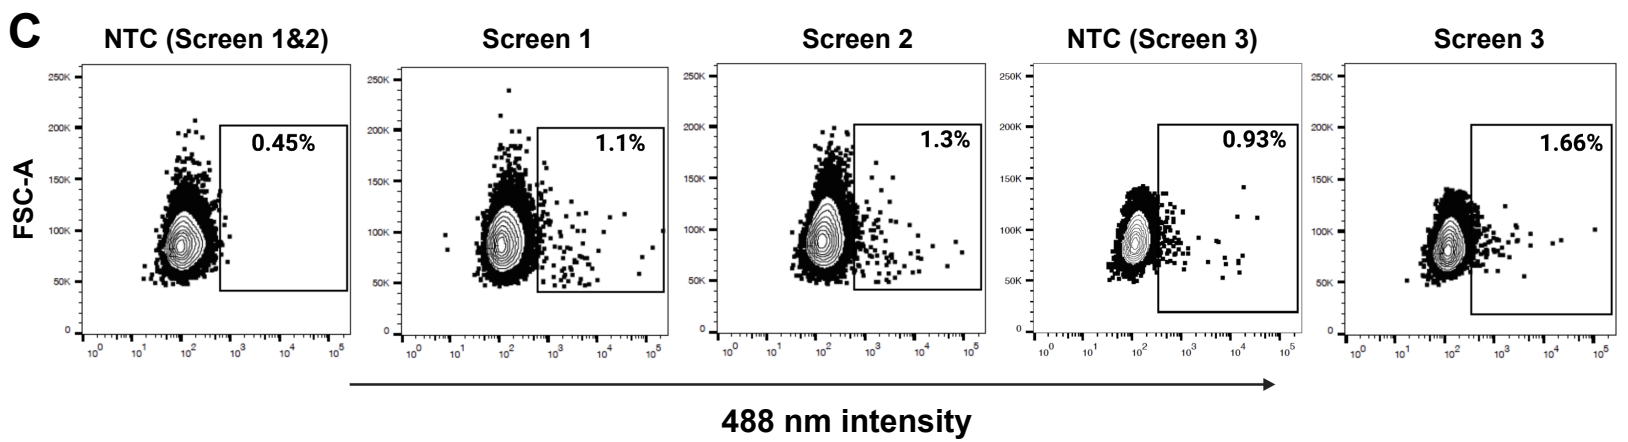

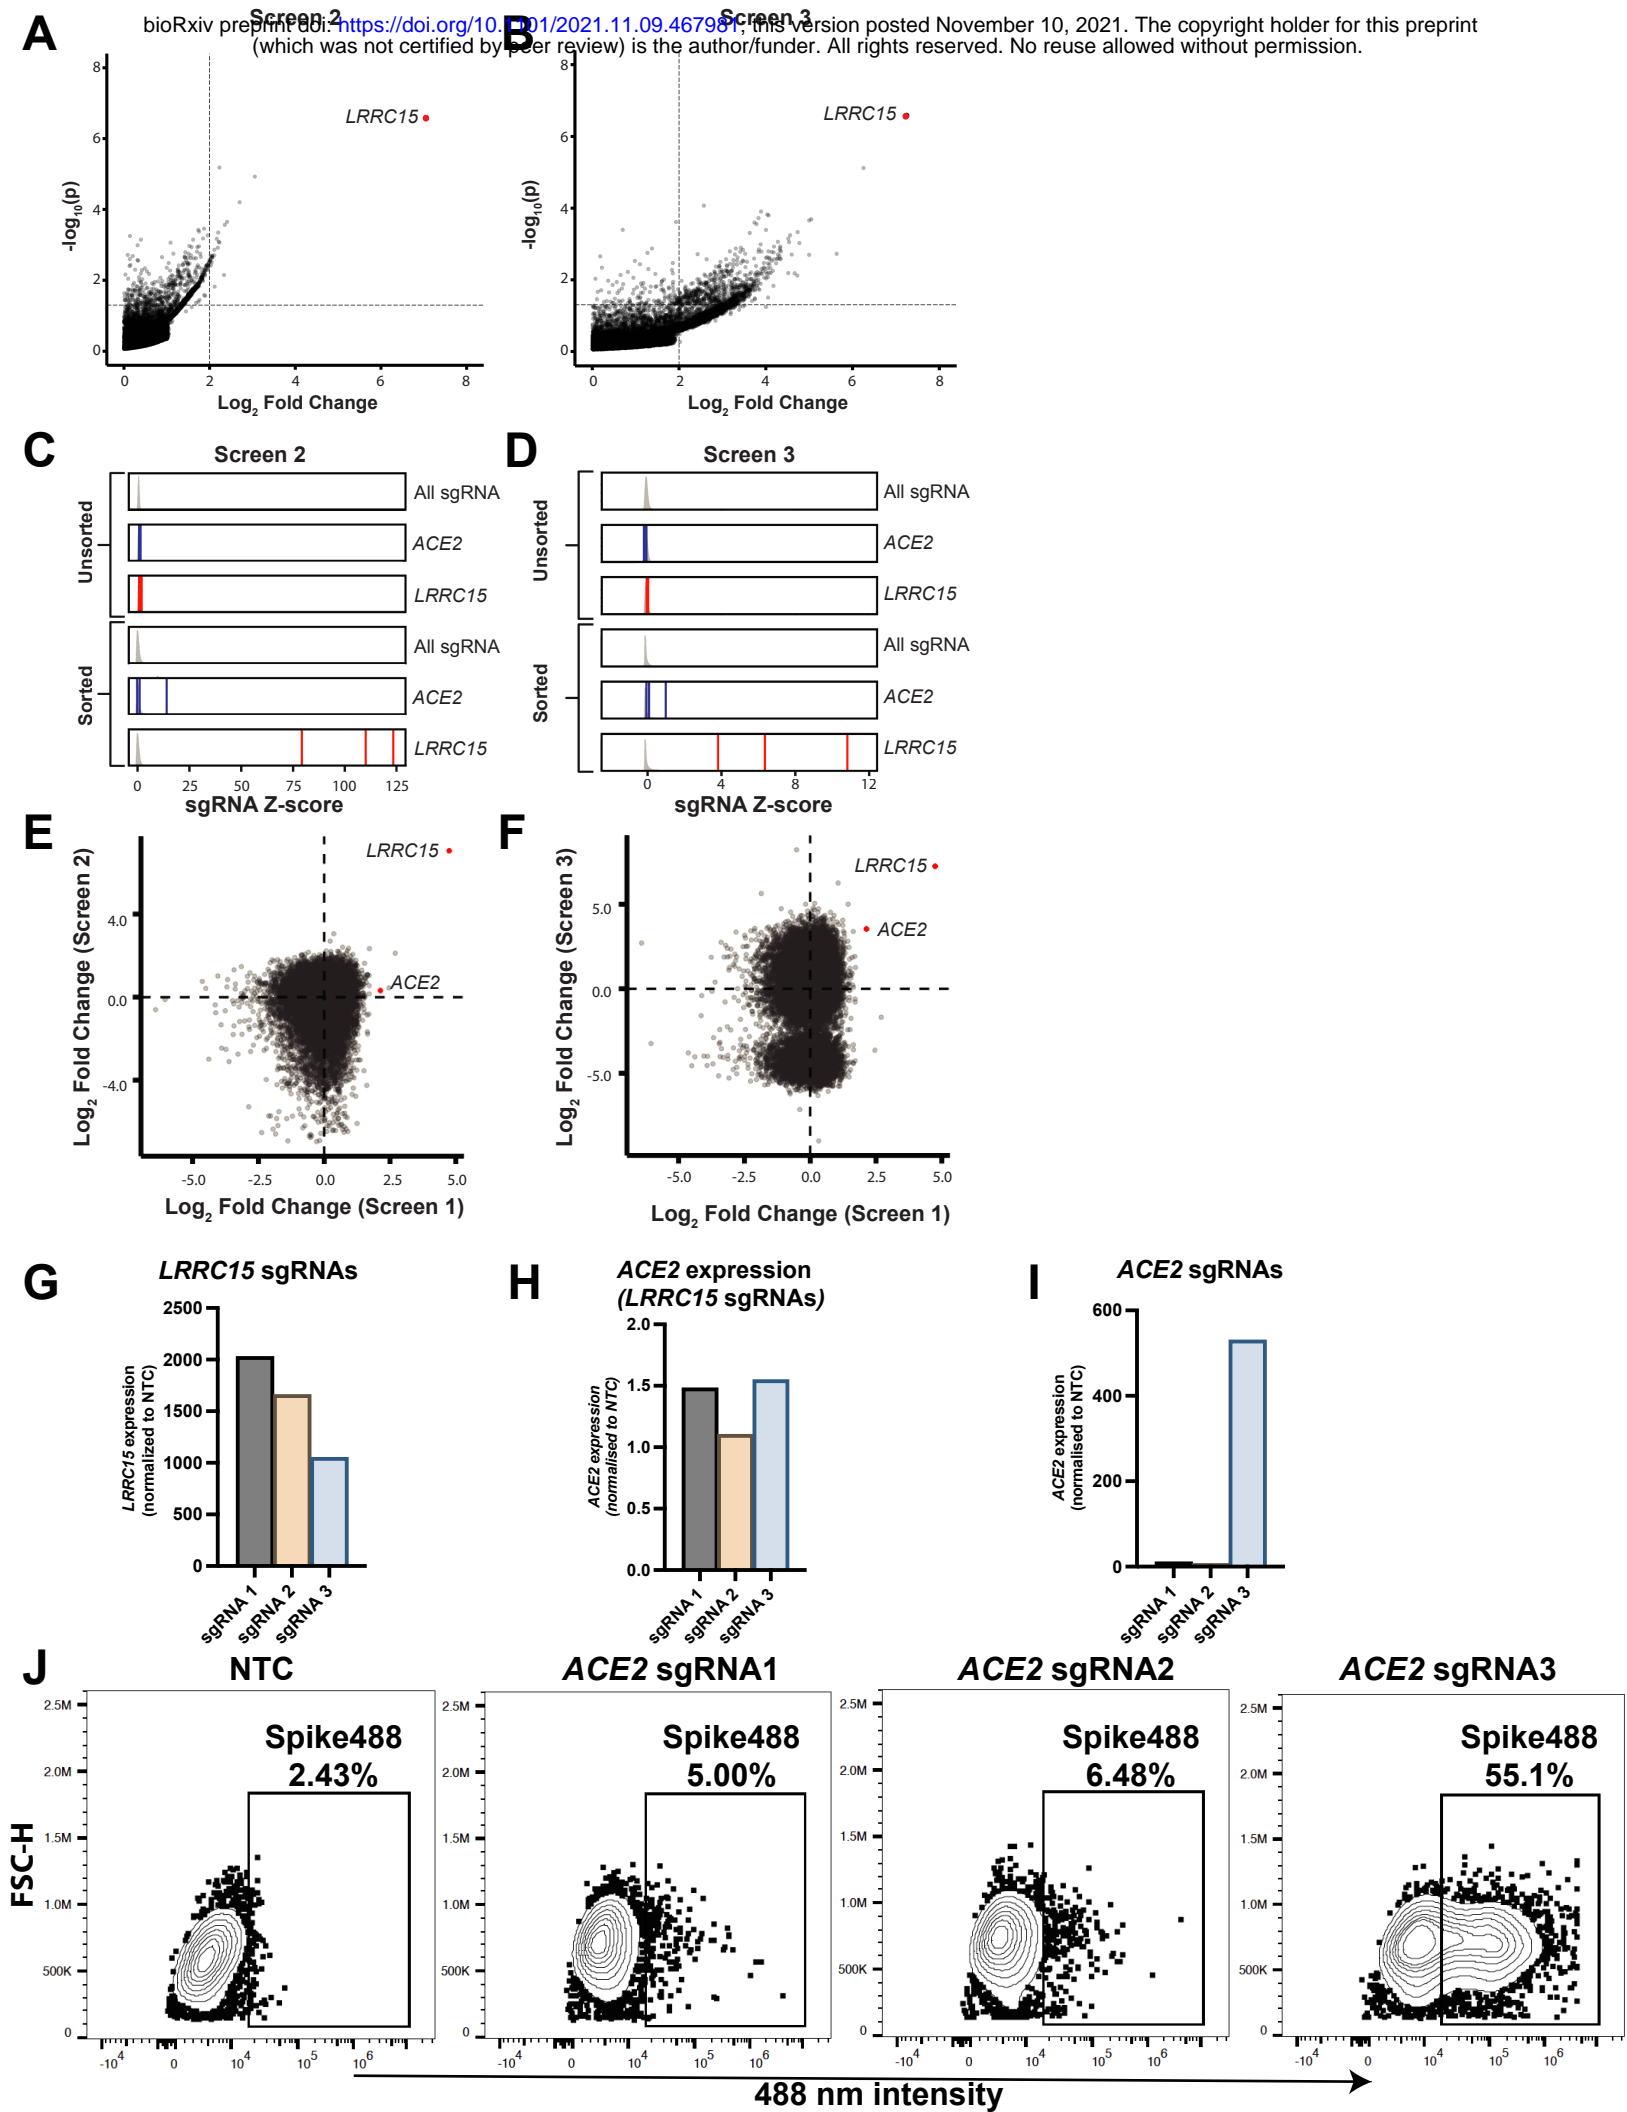

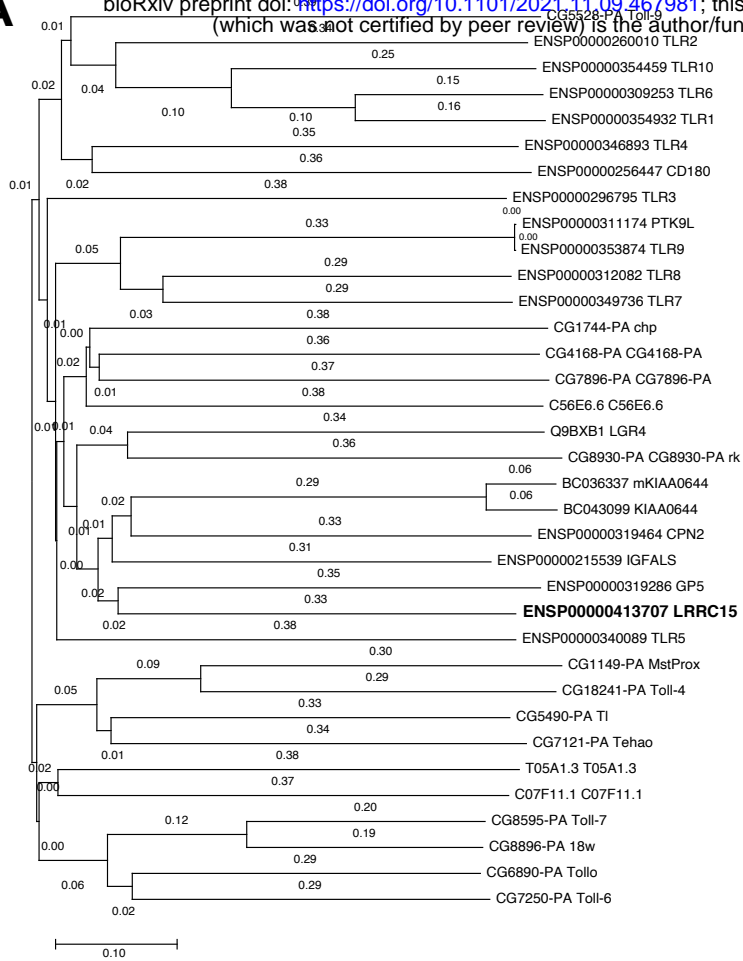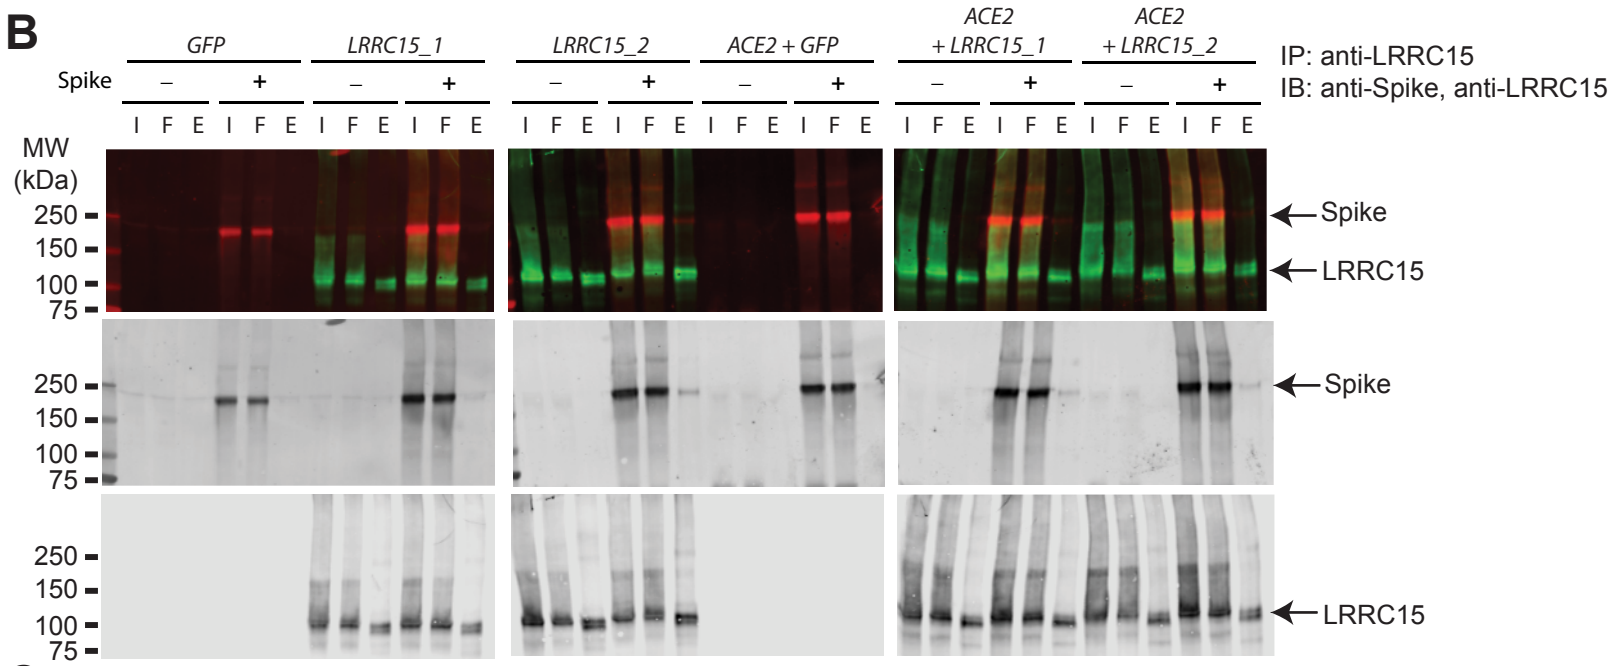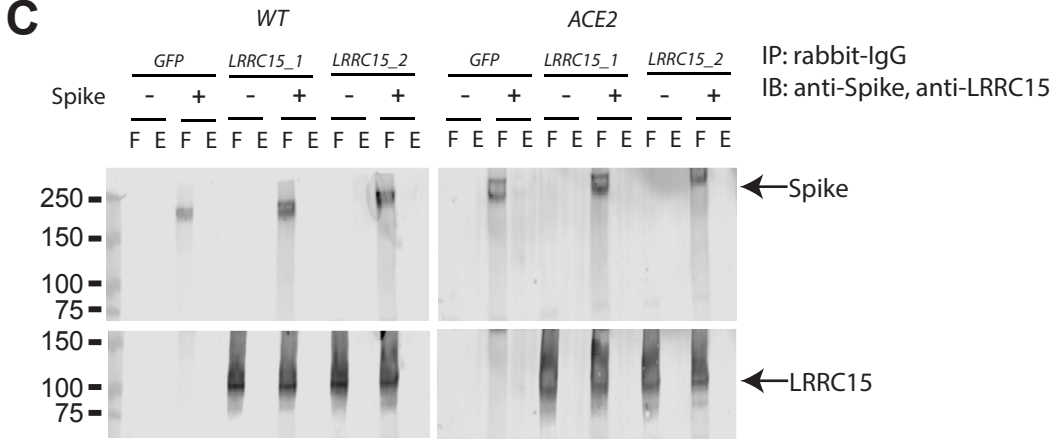



**A**

**SARS-CoV-2 Pseudovirus Infection (Luciferase Assay)**

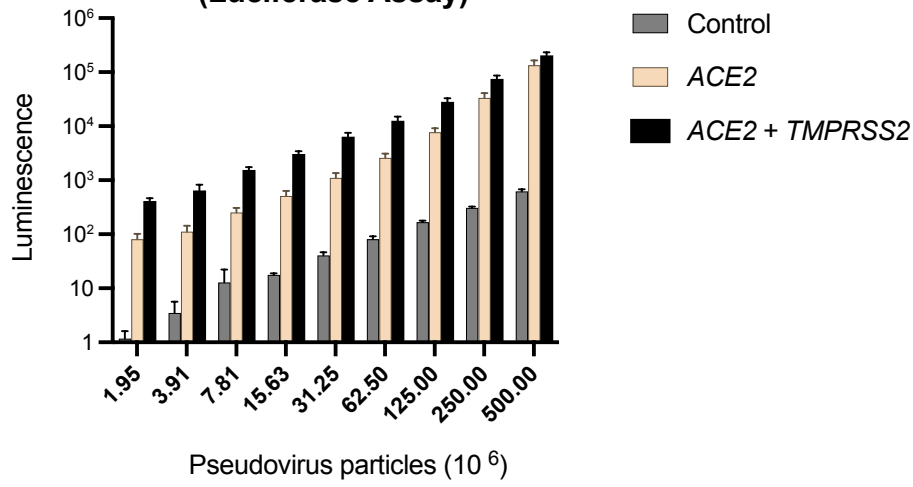

**B**

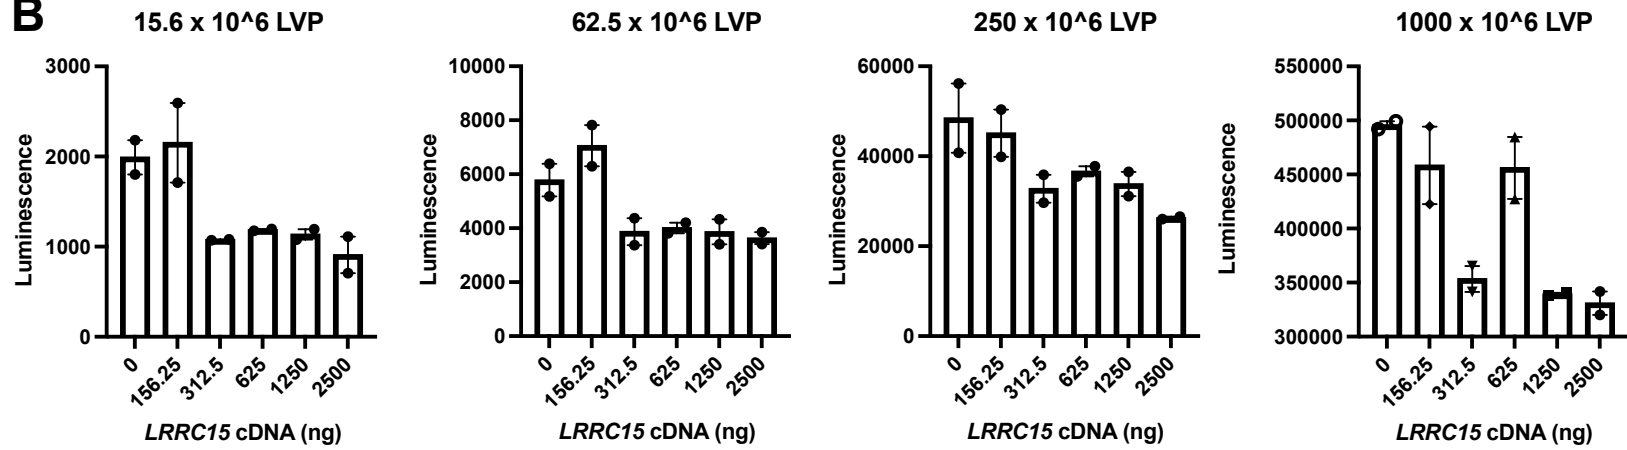

**C**

**HEK293T-ACE2**

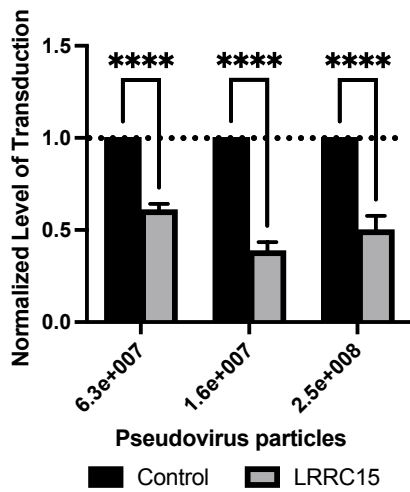

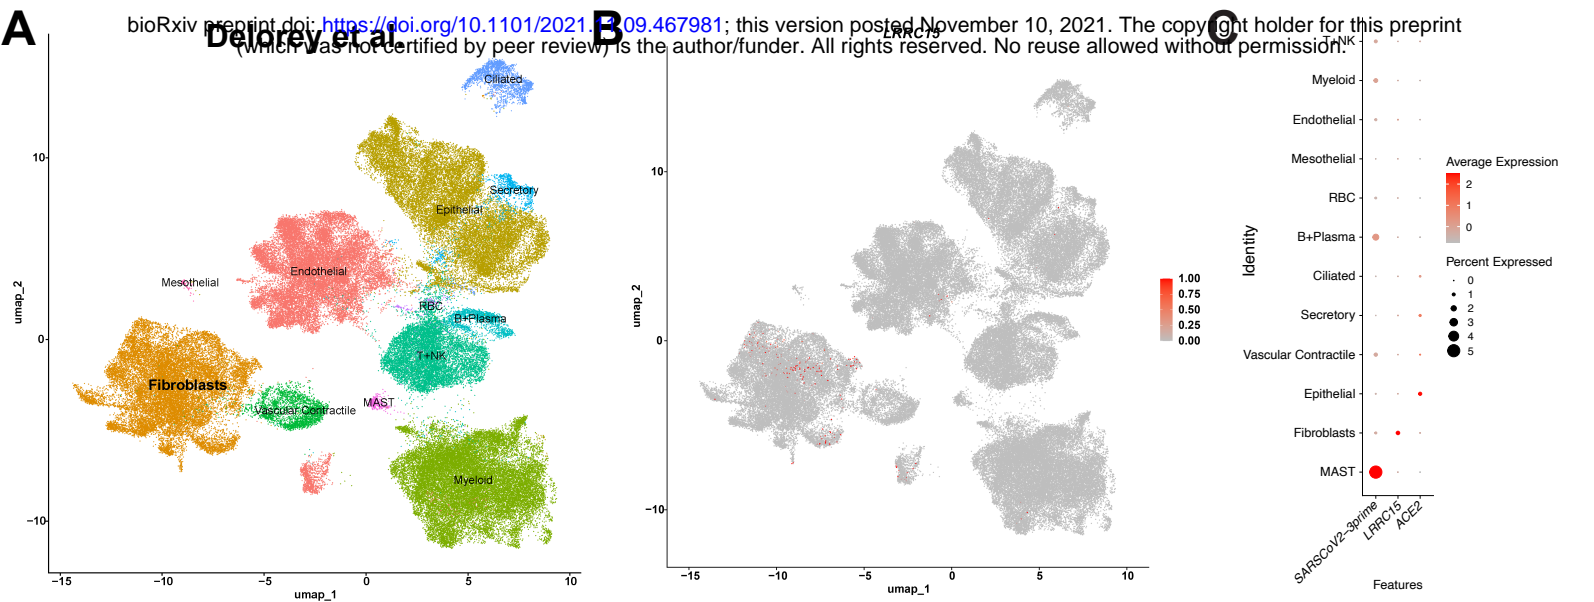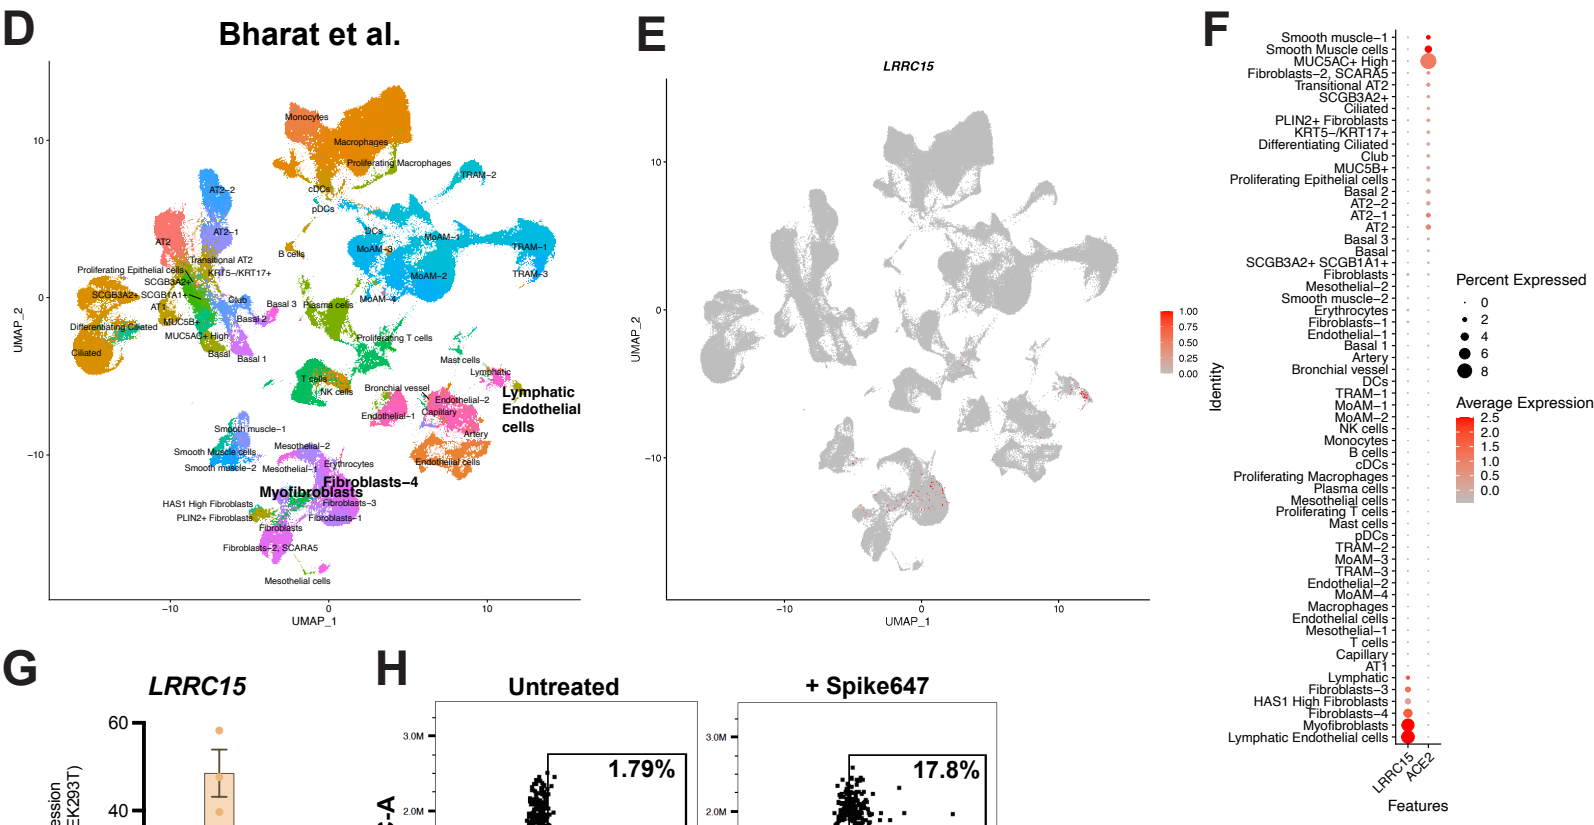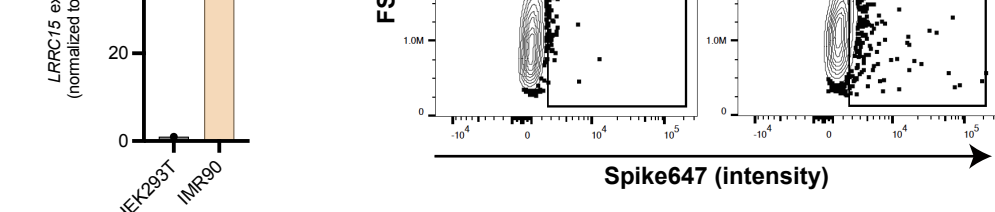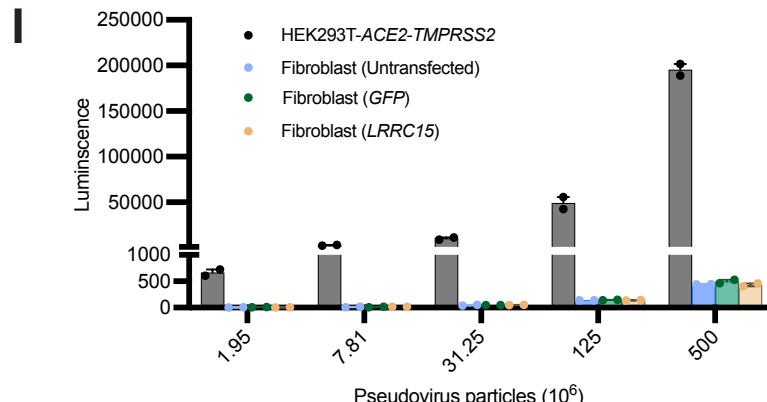

**A**

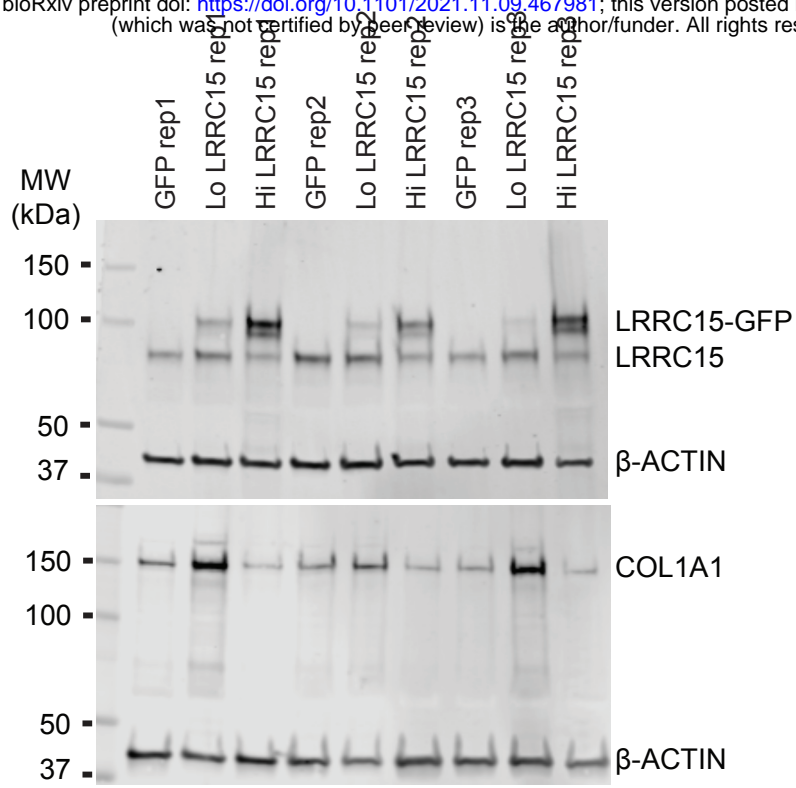

**B**

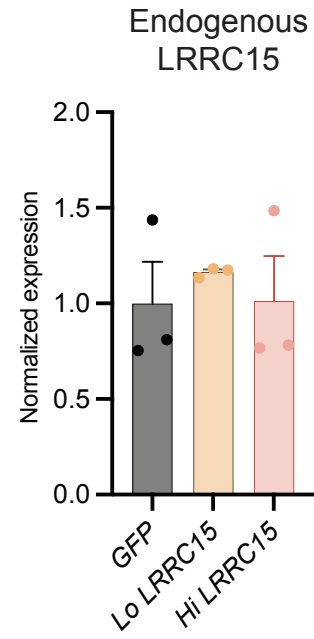

Source: https://www.biorxiv.org/content/10.1101/2021.11.09.467981v1.full.pdf
